# Supplementary material for: A20 in dendritic cells restrains intestinal anti-bacterial peptide expression and preserves commensal homeostasis
Source: PLoS One. 2019 Jul 11;14(7):e0218999. doi: 10.1371/journal.pone.0218999 (PMC6622485; doi:10.1371/journal.pone.0218999)
Supplement: S2 Table — A20dDC mice versus A20Fl/Fl (Cre-) mice group’s comparison of mean relative abundance across repeated measures from 1, 2 or 4 week old littermate pups. (XLSX) [file pone.0218999.s004.xlsx]

## Sheet: Month 2
OTU ID	Total Reads (A20dDC)	Total Reads (Cre-)	Mean Read Difference (A20dDC minus Cre-)	Best Model	Best Model p value	Best Model q value	Phylum	Class	Order	Family	Genus	Species
OTU_5	61839	24581	2191.65	NegBin	0.00487	0.0244	Firmicutes	Bacilli	Lactobacillales	Lactobacillaceae	Lactobacillus	---
OTU_19	42416	16640	1516.24	NegBin	0.0277	0.0922	Firmicutes	Bacilli	Lactobacillales	Lactobacillaceae	Lactobacillus	reuteri
OTU_12	25145	382	1456.65	NegBin	1.98e-07	8.48e-06	Bacteroidetes	Bacteroidia	Bacteroidales	Bacteroidaceae	Bacteroides	---
OTU_4	25879	6018	1168.29	NegBin	1.51e-06	4.1e-05	Bacteroidetes	Bacteroidia	Bacteroidales	Bacteroidaceae	Bacteroides	acidifaciens
OTU_1160	16323	7098	542.65	ZI-NegBin	0.0132	0.0541	Firmicutes	Bacilli	Lactobacillales	Lactobacillaceae	Lactobacillus	---
OTU_40	6660	1900	280	NegBin	0.00147	0.00941	Proteobacteria	Epsilonproteobacteria	Campylobacterales	Helicobacteraceae	Helicobacter	---
OTU_53	4809	1166	214.29	NegBin	0.00188	0.0115	Proteobacteria	Epsilonproteobacteria	Campylobacterales	Helicobacteraceae	Helicobacter	---
OTU_367	2440	3	143.35	NegBin	9.73e-07	2.9e-05	Firmicutes	Bacilli	Lactobacillales	Enterococcaceae	Enterococcus	---
OTU_1049	4001	1645	138.59	NegBin	0.0129	0.0534	Firmicutes	Bacilli	Lactobacillales	Lactobacillaceae	Lactobacillus	---
OTU_39	3101	840	133	NegBin	0.00189	0.0115	Bacteroidetes	Bacteroidia	Bacteroidales	Porphyromonadaceae	Parabacteroides	distasonis
OTU_840	1898	5	111.35	NegBin	1.99e-07	8.48e-06	Bacteroidetes	Bacteroidia	Bacteroidales	Bacteroidaceae	Bacteroides	ovatus
OTU_858	1788	14	104.35	NegBin	2.29e-07	9.11e-06	Bacteroidetes	Bacteroidia	Bacteroidales	Bacteroidaceae	Bacteroides	---
OTU_62	1636	24	94.82	NegBin	5.12e-06	0.000102	Bacteroidetes	Bacteroidia	Bacteroidales	Bacteroidaceae	Bacteroides	uniformis
OTU_144	1731	302	84.06	NegBin	0.0245	0.0834	Firmicutes	Clostridia	Clostridiales	---	---	---
OTU_672	1430	120	77.06	NegBin	6.62e-06	0.00012	Bacteroidetes	Bacteroidia	Bacteroidales	Bacteroidaceae	Bacteroides	acidifaciens
OTU_102	1346	174	68.94	ZI-NegBin	0.00127	0.00881	Firmicutes	Clostridia	Clostridiales	Lachnospiraceae	---	---
OTU_1140	1184	15	68.76	NegBin	1.06e-05	0.000159	Bacteroidetes	Bacteroidia	Bacteroidales	Bacteroidaceae	Bacteroides	---
OTU_876	1556	390	68.59	NegBin	0.000543	0.00438	Bacteroidetes	Bacteroidia	Bacteroidales	Porphyromonadaceae	Parabacteroides	distasonis
OTU_104	1309	242	62.76	NegBin	4.2e-07	1.39e-05	Proteobacteria	Deltaproteobacteria	Desulfovibrionales	Desulfovibrionaceae	Desulfovibrio	---
OTU_562	1067	30	61	NegBin	1.81e-08	1.2e-06	Bacteroidetes	Bacteroidia	Bacteroidales	Bacteroidaceae	Bacteroides	acidifaciens
OTU_795	1249	306	55.47	NegBin	2.07e-05	0.000268	Firmicutes	Bacilli	Lactobacillales	Lactobacillaceae	Lactobacillus	---
OTU_43	1405	474	54.76	ZI-NegBin	0.000179	0.00169	Bacteroidetes	Bacteroidia	Bacteroidales	Bacteroidaceae	Bacteroides	---
OTU_1011	1073	335	43.41	NegBin	0.00334	0.0178	Firmicutes	Bacilli	Lactobacillales	Lactobacillaceae	Lactobacillus	---
OTU_660	1360	626	43.18	ZI-NegBin	0.0241	0.0826	Firmicutes	Bacilli	Lactobacillales	Lactobacillaceae	Lactobacillus	---
OTU_106	790	76	42	NegBin	1.89e-05	0.000257	Bacteroidetes	Bacteroidia	Bacteroidales	Porphyromonadaceae	Parabacteroides	---
OTU_677	935	256	39.94	NegBin	1.8e-05	0.000249	Bacteroidetes	Bacteroidia	Bacteroidales	Bacteroidaceae	Bacteroides	acidifaciens
OTU_1058	897	273	36.71	NegBin	0.000659	0.00509	Firmicutes	Bacilli	Lactobacillales	Lactobacillaceae	Lactobacillus	reuteri
OTU_76	670	133	31.59	NegBin	5.01e-06	0.000102	Bacteroidetes	Bacteroidia	Bacteroidales	S24-7	---	---
OTU_1166	574	80	29.06	NegBin	7.88e-07	2.47e-05	Firmicutes	Bacilli	Lactobacillales	Lactobacillaceae	Lactobacillus	---
OTU_96	898	412	28.59	ZI-NegBin	0.00789	0.0362	Firmicutes	Clostridia	Clostridiales	Lachnospiraceae	---	---
OTU_874	541	76	27.35	NegBin	0.000104	0.00105	Bacteroidetes	Bacteroidia	Bacteroidales	Porphyromonadaceae	Parabacteroides	---
OTU_278	726	294	25.41	NegBin	0.00786	0.0362	Firmicutes	Bacilli	Lactobacillales	Lactobacillaceae	Lactobacillus	---
OTU_673	510	84	25.06	ZI-NegBin	2.57e-05	0.000319	Bacteroidetes	Bacteroidia	Bacteroidales	Bacteroidaceae	Bacteroides	---
OTU_1095	529	111	24.59	ZI-NegBin	5.29e-06	0.000102	Bacteroidetes	Bacteroidia	Bacteroidales	Bacteroidaceae	Bacteroides	---
OTU_764	492	105	22.76	NegBin	3.61e-05	0.000422	Proteobacteria	Deltaproteobacteria	Desulfovibrionales	Desulfovibrionaceae	Desulfovibrio	---
OTU_888	399	46	20.76	NegBin	0.0314	0.0996	Firmicutes	Bacilli	Lactobacillales	Lactobacillaceae	Lactobacillus	---
OTU_389	408	82	19.18	NegBin	9.41e-06	0.000148	Bacteroidetes	Bacteroidia	Bacteroidales	Bacteroidaceae	Bacteroides	---
OTU_674	428	103	19.12	NegBin	1.03e-05	0.000157	Bacteroidetes	Bacteroidia	Bacteroidales	Bacteroidaceae	Bacteroides	---
OTU_408	363	51	18.35	NegBin	0.00012	0.00119	Firmicutes	Clostridia	Clostridiales	Ruminococcaceae	Oscillospira	---
OTU_207	325	13	18.35	NegBin	0.0121	0.0508	Firmicutes	Clostridia	Clostridiales	---	---	---
OTU_1061	415	105	18.24	NegBin	0.00119	0.00855	Firmicutes	Bacilli	Lactobacillales	Lactobacillaceae	Lactobacillus	---
OTU_695	284	6	16.35	NegBin	6.16e-06	0.000115	Bacteroidetes	Bacteroidia	Bacteroidales	Bacteroidaceae	Bacteroides	---
OTU_132	367	95	16	ZI-NegBin	0.00152	0.00955	Firmicutes	Erysipelotrichi	Erysipelotrichales	Erysipelotrichaceae	Coprobacillus	---
OTU_790	382	119	15.47	NegBin	0.00579	0.0278	Proteobacteria	Epsilonproteobacteria	Campylobacterales	Helicobacteraceae	Helicobacter	---
OTU_201	202	3	11.71	NegBin	8.51e-05	0.000905	Firmicutes	Clostridia	Clostridiales	Ruminococcaceae	Anaerotruncus	---
OTU_212	229	48	10.65	NegBin	0.00936	0.041	Firmicutes	Erysipelotrichi	Erysipelotrichales	Erysipelotrichaceae	---	---
OTU_820	207	46	9.47	NegBin	2.27e-05	0.000288	Firmicutes	Bacilli	Lactobacillales	Lactobacillaceae	Lactobacillus	---
OTU_640	226	80	8.59	ZI-NegBin	0.0139	0.0563	Firmicutes	Bacilli	Lactobacillales	Lactobacillaceae	Lactobacillus	---
OTU_782	140	1	8.18	ZI-NegBin	1.62e-05	0.00023	Bacteroidetes	Bacteroidia	Bacteroidales	S24-7	---	---
OTU_188	149	40	6.41	NegBin	0.00373	0.0195	Firmicutes	Clostridia	Clostridiales	Lachnospiraceae	---	---
OTU_608	161	63	5.76	NegBin	0.00572	0.0277	Bacteroidetes	Bacteroidia	Bacteroidales	Bacteroidaceae	Bacteroides	acidifaciens
OTU_422	125	30	5.59	NegBin	3.36e-05	0.000409	Proteobacteria	Deltaproteobacteria	Desulfovibrionales	Desulfovibrionaceae	Desulfovibrio	---
OTU_794	114	21	5.47	NegBin	0.00143	0.00929	Firmicutes	Clostridia	Clostridiales	Lachnospiraceae	---	---
OTU_1027	93	5	5.18	NegBin	0.000749	0.00565	Bacteroidetes	Bacteroidia	Bacteroidales	Porphyromonadaceae	Parabacteroides	distasonis
OTU_812	158	80	4.59	NegBin	0.014	0.0563	Bacteroidetes	Bacteroidia	Bacteroidales	Bacteroidaceae	Bacteroides	acidifaciens
OTU_1051	88	10	4.59	NegBin	0.0179	0.0669	Firmicutes	Clostridia	Clostridiales	Lachnospiraceae	---	---
OTU_612	84	18	3.88	ZI-NegBin	9.74e-05	0.001	Bacteroidetes	Bacteroidia	Bacteroidales	Bacteroidaceae	Bacteroides	---
OTU_1031	78	16	3.65	NegBin	0.0014	0.00924	Firmicutes	Clostridia	Clostridiales	Lachnospiraceae	---	---
OTU_1072	75	24	3	NegBin	0.0178	0.0669	Proteobacteria	Epsilonproteobacteria	Campylobacterales	Helicobacteraceae	Helicobacter	---
OTU_1180	51	6	2.65	NegBin	0.000141	0.00135	Bacteroidetes	Bacteroidia	Bacteroidales	Bacteroidaceae	Bacteroides	---
OTU_3	34	3	1.82	NegBin	0.0149	0.0588	Proteobacteria	Gammaproteobacteria	Pasteurellales	Pasteurellaceae	Aggregatibacter	pneumotropica
OTU_1165	15	4	0.65	Poisson	0.0188	0.0684	Proteobacteria	Deltaproteobacteria	Desulfovibrionales	Desulfovibrionaceae	Desulfovibrio	---
OTU_6	4321	49569	-2661.65	ZI-NegBin	1.5713e-12	3.12165e-10	Bacteroidetes	Bacteroidia	Bacteroidales	S24-7	---	---
OTU_2	33360	63672	-1783.06	ZI-NegBin	0.0186844	0.0683557	Bacteroidetes	Bacteroidia	Bacteroidales	Prevotellaceae	Prevotella	---
OTU_16	133	15261	-889.882	ZI-NegBin	0.000180962	0.00168521	Firmicutes	Erysipelotrichi	Erysipelotrichales	Erysipelotrichaceae	Allobaculum	---
OTU_14	7417	20140	-748.412	ZI-NegBin	0.000810081	0.0060351	Bacteroidetes	Bacteroidia	Bacteroidales	S24-7	---	---
OTU_30	1786	10939	-538.412	ZI-NegBin	3.95135e-05	0.000452886	Bacteroidetes	Bacteroidia	Bacteroidales	S24-7	---	---
OTU_36	3120	11721	-505.941	ZI-NegBin	0.00321094	0.0173975	Firmicutes	Clostridia	Clostridiales	---	---	---
OTU_22	2319	10805	-499.176	ZI-NegBin	1.36387e-06	3.87081e-05	Bacteroidetes	Bacteroidia	Bacteroidales	S24-7	---	---
OTU_556	266	3027	-162.412	ZI-NegBin	4.93047e-10	5.87712e-08	Bacteroidetes	Bacteroidia	Bacteroidales	S24-7	---	---
OTU_31	1760	4486	-160.353	NegBin	0.00730684	0.0342904	Bacteroidetes	Bacteroidia	Bacteroidales	S24-7	---	---
OTU_72	1331	3984	-156.059	ZI-NegBin	0.0155125	0.0608253	Firmicutes	Clostridia	Clostridiales	Ruminococcaceae	Oscillospira	---
OTU_45	2139	4690	-150.059	ZI-NegBin	0.0198832	0.0718207	Bacteroidetes	Bacteroidia	Bacteroidales	S24-7	---	---
OTU_129	316	2486	-127.647	NegBin	0.00269632	0.0151604	Proteobacteria	Deltaproteobacteria	Desulfovibrionales	Desulfovibrionaceae	Desulfovibrio	---
OTU_952	1135	3191	-120.941	ZI-NegBin	0.0271487	0.0914158	Firmicutes	Clostridia	Clostridiales	---	---	---
OTU_519	1901	3663	-103.647	ZI-NegBin	0.0205095	0.0736366	Bacteroidetes	Bacteroidia	Bacteroidales	Prevotellaceae	Prevotella	---
OTU_128	541	1877	-78.5882	NegBin	0.00441215	0.0226693	Firmicutes	Clostridia	Clostridiales	Lachnospiraceae	---	---
OTU_962	1006	2039	-60.7647	NegBin	0.0239602	0.0826061	Bacteroidetes	Bacteroidia	Bacteroidales	S24-7	---	---
OTU_80	775	1772	-58.6471	ZI-NegBin	0.00128671	0.00881471	Bacteroidetes	Bacteroidia	Bacteroidales	S24-7	---	---
OTU_498	126	1108	-57.7647	NegBin	0.000358089	0.00306271	Firmicutes	Erysipelotrichi	Erysipelotrichales	Erysipelotrichaceae	Allobaculum	---
OTU_133	307	1258	-55.9412	NegBin	0.0029661	0.0163685	Firmicutes	Clostridia	Clostridiales	---	---	---
OTU_180	522	1464	-55.4118	NegBin	0.0177467	0.0669334	Firmicutes	Clostridia	Clostridiales	Ruminococcaceae	Oscillospira	---
OTU_1060	132	1059	-54.5294	NegBin	8.10708e-06	0.000142112	Firmicutes	Clostridia	Clostridiales	---	---	---
OTU_998	699	1593	-52.5882	ZI-NegBin	0.0133723	0.0545881	Bacteroidetes	Bacteroidia	Bacteroidales	Prevotellaceae	Prevotella	---
OTU_73	821	1714	-52.5294	ZI-NegBin	0.0106736	0.0458808	Bacteroidetes	Bacteroidia	Bacteroidales	S24-7	---	---
OTU_192	266	1069	-47.2353	NegBin	0.00675768	0.0322206	Firmicutes	Clostridia	Clostridiales	Lachnospiraceae	---	---
OTU_101	455	1227	-45.4118	ZI-NegBin	0.000474448	0.00392738	Firmicutes	Clostridia	Clostridiales	Ruminococcaceae	Oscillospira	---
OTU_536	55	824	-45.2353	NegBin	4.16491e-05	0.000468356	Firmicutes	Clostridia	Clostridiales	---	---	---
OTU_601	162	927	-45	NegBin	0.0282792	0.0931184	Firmicutes	Clostridia	Clostridiales	---	---	---
OTU_156	160	898	-43.4118	NegBin	0.00722931	0.0341958	Firmicutes	Clostridia	Clostridiales	Ruminococcaceae	Ruminococcus	---
OTU_489	93	756	-39	ZI-NegBin	4.27995e-14	2.55085e-11	Bacteroidetes	Bacteroidia	Bacteroidales	S24-7	---	---
OTU_918	230	852	-36.5882	ZI-NegBin	0.00109525	0.00796057	Actinobacteria	Actinobacteria	Bifidobacteriales	Bifidobacteriaceae	Bifidobacterium	---
OTU_477	386	999	-36.0588	ZI-NegBin	0.0180879	0.0673776	Actinobacteria	Actinobacteria	Bifidobacteriales	Bifidobacteriaceae	Bifidobacterium	---
OTU_361	212	816	-35.5294	NegBin	0.000278663	0.00247885	Firmicutes	Clostridia	Clostridiales	Ruminococcaceae	---	---
OTU_117	151	731	-34.1176	NegBin	0.00302701	0.0165514	Firmicutes	Clostridia	Clostridiales	---	---	---
OTU_1136	164	660	-29.1765	NegBin	0.00353791	0.0186601	Bacteroidetes	Bacteroidia	Bacteroidales	[Paraprevotellaceae]	[Prevotella]	---
OTU_1002	74	569	-29.1176	NegBin	1.72636e-07	8.47876e-06	Bacteroidetes	Bacteroidia	Bacteroidales	S24-7	---	---
OTU_604	301	771	-27.6471	NegBin	0.0145615	0.0578579	Firmicutes	Clostridia	Clostridiales	Ruminococcaceae	---	---
OTU_1040	98	551	-26.6471	NegBin	2.48724e-06	6.17664e-05	Bacteroidetes	Bacteroidia	Bacteroidales	S24-7	---	---
OTU_411	53	463	-24.1176	NegBin	0.00136447	0.00924119	Bacteroidetes	Bacteroidia	Bacteroidales	Rikenellaceae	---	---
OTU_639	145	549	-23.7647	NegBin	0.00269511	0.0151604	Firmicutes	Clostridia	Clostridiales	---	---	---
OTU_1003	14	413	-23.4706	NegBin	6.81956e-08	3.69496e-06	Firmicutes	Clostridia	Clostridiales	---	---	---
OTU_687	47	441	-23.1765	NegBin	1.24778e-11	1.85919e-09	Bacteroidetes	Bacteroidia	Bacteroidales	S24-7	---	---
OTU_314	209	599	-22.9412	NegBin	0.0296354	0.095474	Firmicutes	Clostridia	Clostridiales	---	---	---
OTU_522	66	446	-22.3529	NegBin	0.00127554	0.00881471	Firmicutes	Erysipelotrichi	Erysipelotrichales	Erysipelotrichaceae	Allobaculum	---
OTU_145	8	361	-20.7647	ZI-NegBin	1.82033e-06	4.71702e-05	Firmicutes	Clostridia	Clostridiales	Lachnospiraceae	Roseburia	---
OTU_159	187	514	-19.2353	NegBin	0.0289565	0.0945841	Firmicutes	Clostridia	Clostridiales	Ruminococcaceae	---	---
OTU_284	187	513	-19.1765	NegBin	0.0186946	0.0683557	Firmicutes	Clostridia	Clostridiales	---	---	---
OTU_189	96	381	-16.7647	NegBin	0.000278629	0.00247885	Firmicutes	Clostridia	Clostridiales	---	---	---
OTU_802	52	332	-16.4706	NegBin	2.01064e-08	1.19834e-06	Bacteroidetes	Bacteroidia	Bacteroidales	S24-7	---	---
OTU_416	74	349	-16.1765	ZI-NegBin	7.52813e-05	0.000815776	Firmicutes	Clostridia	Clostridiales	Ruminococcaceae	Oscillospira	---
OTU_600	28	291	-15.4706	NegBin	0.000500908	0.00408961	Firmicutes	Clostridia	Clostridiales	Ruminococcaceae	---	---
OTU_902	20	279	-15.2353	NegBin	1.21894e-09	1.21082e-07	Bacteroidetes	Bacteroidia	Bacteroidales	S24-7	---	---
OTU_113	1	226	-13.2353	NegBin	3.67518e-07	1.28848e-05	Tenericutes	Mollicutes	Mycoplasmatales	Mycoplasmataceae	---	---
OTU_360	179	402	-13.1176	ZI-NegBin	0.0158963	0.0619229	Bacteroidetes	Bacteroidia	Bacteroidales	S24-7	---	---
OTU_202	144	350	-12.1176	NegBin	0.0125274	0.0522121	Firmicutes	Clostridia	Clostridiales	---	---	---
OTU_809	93	296	-11.9412	NegBin	0.00798221	0.036316	Firmicutes	Clostridia	Clostridiales	---	---	---
OTU_255	44	246	-11.8824	NegBin	7.36421e-05	0.000812791	Actinobacteria	Coriobacteriia	Coriobacteriales	Coriobacteriaceae	---	---
OTU_1026	53	240	-11	NegBin	9.09358e-06	0.000147529	Bacteroidetes	Bacteroidia	Bacteroidales	S24-7	---	---
OTU_696	29	213	-10.8235	NegBin	1.80935e-09	1.54053e-07	Bacteroidetes	Bacteroidia	Bacteroidales	S24-7	---	---
OTU_219	105	281	-10.3529	NegBin	0.02764	0.0922037	Firmicutes	Clostridia	Clostridiales	---	---	---
OTU_131	167	340	-10.1765	ZI-NegBin	0.0302833	0.096518	Bacteroidetes	Bacteroidia	Bacteroidales	Rikenellaceae	---	---
OTU_574	13	185	-10.1176	NegBin	9.20595e-05	0.000962587	Firmicutes	Clostridia	Clostridiales	---	---	---
OTU_716	13	179	-9.76471	NegBin	9.67516e-13	2.8832e-10	Bacteroidetes	Bacteroidia	Bacteroidales	S24-7	---	---
OTU_195	111	272	-9.47059	NegBin	0.0298379	0.0956095	Bacteroidetes	Bacteroidia	Bacteroidales	S24-7	---	---
OTU_398	8	160	-8.94118	NegBin	1.44128e-05	0.000209513	Firmicutes	Clostridia	Clostridiales	Ruminococcaceae	---	---
OTU_458	75	214	-8.17647	NegBin	0.00325004	0.0174507	Actinobacteria	Coriobacteriia	Coriobacteriales	Coriobacteriaceae	Adlercreutzia	---
OTU_190	105	243	-8.11765	NegBin	0.0296109	0.095474	Firmicutes	Clostridia	Clostridiales	Ruminococcaceae	Ruminococcus	---
OTU_235	33	167	-7.88235	NegBin	4.19963e-06	9.10163e-05	Actinobacteria	Coriobacteriia	Coriobacteriales	Coriobacteriaceae	Adlercreutzia	---
OTU_222	66	195	-7.58824	NegBin	0.00260965	0.0151005	Firmicutes	Clostridia	Clostridiales	Ruminococcaceae	---	---
OTU_247	40	168	-7.52941	NegBin	0.00742288	0.0345628	Firmicutes	Clostridia	Clostridiales	Clostridiaceae	---	---
OTU_194	104	228	-7.29412	ZI-NegBin	0.00834436	0.0373928	Bacteroidetes	Bacteroidia	Bacteroidales	S24-7	---	---
OTU_288	42	163	-7.11765	NegBin	0.016633	0.0639568	Actinobacteria	Coriobacteriia	Coriobacteriales	Coriobacteriaceae	Adlercreutzia	---
OTU_447	56	170	-6.70588	NegBin	0.00497097	0.0246891	Firmicutes	Clostridia	Clostridiales	---	---	---
OTU_234	34	143	-6.41176	NegBin	0.00027312	0.00247885	Firmicutes	Clostridia	Clostridiales	Peptococcaceae	---	---
OTU_186	66	173	-6.29412	NegBin	0.0114119	0.0485823	Bacteroidetes	Bacteroidia	Bacteroidales	Rikenellaceae	---	---
OTU_685	96	195	-5.82353	NegBin	0.0225531	0.0786062	Bacteroidetes	Bacteroidia	Bacteroidales	S24-7	---	---
OTU_214	77	176	-5.82353	NegBin	0.0316709	0.0998724	Firmicutes	Clostridia	Clostridiales	---	---	---
OTU_544	2	100	-5.76471	NegBin	3.50262e-07	1.28848e-05	Bacteroidetes	Bacteroidia	Bacteroidales	S24-7	---	---
OTU_253	36	133	-5.70588	NegBin	0.00062486	0.00490022	Bacteroidetes	Bacteroidia	Bacteroidales	S24-7	---	---
OTU_248	15	110	-5.58824	NegBin	4.27594e-06	9.10163e-05	Firmicutes	Clostridia	Clostridiales	Ruminococcaceae	---	---
OTU_242	3	97	-5.52941	NegBin	3.75575e-06	8.9537e-05	Firmicutes	Clostridia	Clostridiales	---	---	---
OTU_244	63	156	-5.47059	NegBin	0.00139605	0.00924498	Bacteroidetes	Bacteroidia	Bacteroidales	S24-7	---	---
OTU_877	25	116	-5.35294	NegBin	0.000304571	0.00266948	---	---	---	---	---	---
OTU_223	40	131	-5.35294	NegBin	0.00841868	0.0374443	Firmicutes	Clostridia	Clostridiales	---	---	---
OTU_353	29	119	-5.29412	NegBin	0.0107004	0.0458808	Firmicutes	Clostridia	Clostridiales	Lachnospiraceae	---	---
OTU_336	87	175	-5.17647	NegBin	0.00981113	0.042682	Bacteroidetes	Bacteroidia	Bacteroidales	S24-7	---	---
OTU_274	3	91	-5.17647	NegBin	4.20438e-06	9.10163e-05	Firmicutes	Clostridia	Clostridiales	---	---	---
OTU_1139	29	114	-5	NegBin	0.000359714	0.00306271	Bacteroidetes	Bacteroidia	Bacteroidales	Prevotellaceae	Prevotella	---
OTU_759	35	118	-4.88235	NegBin	0.00544992	0.0268442	Firmicutes	Clostridia	Clostridiales	Ruminococcaceae	Oscillospira	---
OTU_404	6	88	-4.82353	NegBin	0.000444294	0.00372957	Firmicutes	Erysipelotrichi	Erysipelotrichales	Erysipelotrichaceae	Allobaculum	---
OTU_294	27	108	-4.76471	ZI-NegBin	0.0221753	0.0777441	Actinobacteria	Coriobacteriia	Coriobacteriales	Coriobacteriaceae	Adlercreutzia	---
OTU_602	31	111	-4.70588	NegBin	0.00281885	0.0157012	Firmicutes	Clostridia	Clostridiales	Ruminococcaceae	Oscillospira	---
OTU_760	32	108	-4.47059	NegBin	0.00906704	0.0400293	Firmicutes	Clostridia	Clostridiales	Ruminococcaceae	Ruminococcus	---
OTU_340	18	94	-4.47059	NegBin	0.0209155	0.0742001	Firmicutes	Clostridia	Clostridiales	Ruminococcaceae	---	---
OTU_326	10	85	-4.41176	NegBin	0.000124552	0.00121693	Actinobacteria	Coriobacteriia	Coriobacteriales	Coriobacteriaceae	Adlercreutzia	---
OTU_283	13	84	-4.17647	NegBin	0.0012504	0.00881471	Firmicutes	Clostridia	Clostridiales	---	---	---
OTU_276	26	95	-4.05882	NegBin	0.00152051	0.00955409	Firmicutes	Clostridia	Clostridiales	Ruminococcaceae	---	---
OTU_725	9	73	-3.76471	Poisson	3.11287e-09	2.31909e-07	Bacteroidetes	Bacteroidia	Bacteroidales	S24-7	---	---
OTU_260	12	76	-3.76471	NegBin	9.32455e-06	0.000147529	Firmicutes	Clostridia	Clostridiales	---	---	---
OTU_826	60	123	-3.70588	NegBin	0.0212918	0.0750883	Bacteroidetes	Bacteroidia	Bacteroidales	S24-7	---	---
OTU_359	3	63	-3.52941	NegBin	2.01054e-05	0.000266285	Actinobacteria	Coriobacteriia	Coriobacteriales	Coriobacteriaceae	Adlercreutzia	---
OTU_267	53	113	-3.52941	NegBin	0.0207962	0.0742001	Actinobacteria	Coriobacteriia	Coriobacteriales	Coriobacteriaceae	Adlercreutzia	---
OTU_246	36	95	-3.47059	NegBin	0.0290418	0.0945841	Firmicutes	Clostridia	Clostridiales	Ruminococcaceae	---	---
OTU_711	15	71	-3.29412	NegBin	0.0142679	0.0570714	Bacteroidetes	Bacteroidia	Bacteroidales	Prevotellaceae	Prevotella	---
OTU_729	11	65	-3.17647	ZI-NegBin	0.000557829	0.00443288	Firmicutes	Clostridia	Clostridiales	---	---	---
OTU_755	16	70	-3.17647	NegBin	0.000919258	0.00676392	Bacteroidetes	Bacteroidia	Bacteroidales	S24-7	---	---
OTU_290	23	77	-3.17647	NegBin	0.00806345	0.0364077	Firmicutes	Clostridia	Clostridiales	Lachnospiraceae	[Ruminococcus]	gnavus
OTU_1010	12	63	-3	NegBin	0.0116176	0.0491069	Firmicutes	Erysipelotrichi	Erysipelotrichales	Erysipelotrichaceae	Allobaculum	---
OTU_320	4	52	-2.82353	NegBin	0.00421612	0.0218505	Firmicutes	Clostridia	Clostridiales	---	---	---
OTU_1055	2	44	-2.47059	NegBin	3.51441e-05	0.000418917	Bacteroidetes	Bacteroidia	Bacteroidales	S24-7	---	---
OTU_307	28	69	-2.41176	NegBin	0.0281009	0.0930452	Firmicutes	Clostridia	Clostridiales	Ruminococcaceae	Oscillospira	---
OTU_306	13	53	-2.35294	NegBin	0.00221038	0.0133069	Bacteroidetes	Bacteroidia	Bacteroidales	Rikenellaceae	---	---
OTU_365	6	40	-2	NegBin	0.00238719	0.0142277	Firmicutes	Clostridia	Clostridiales	---	---	---
OTU_1041	7	40	-1.94118	NegBin	0.0014344	0.00929244	Bacteroidetes	Bacteroidia	Bacteroidales	S24-7	---	---
OTU_349	12	43	-1.82353	NegBin	0.00252025	0.0147262	Firmicutes	Clostridia	Clostridiales	---	---	---
OTU_828	10	38	-1.64706	NegBin	0.00266422	0.0151604	Bacteroidetes	Bacteroidia	Bacteroidales	S24-7	---	---
OTU_241	12	40	-1.64706	ZI-NegBin	0.0186043	0.0683557	Firmicutes	Erysipelotrichi	Erysipelotrichales	Erysipelotrichaceae	---	---
OTU_363	2	27	-1.47059	NegBin	0.00471627	0.0238212	Firmicutes	Clostridia	Clostridiales	---	---	---
OTU_758	3	25	-1.29412	NegBin	0.00189143	0.0115091	Firmicutes	Clostridia	Clostridiales	Ruminococcaceae	Oscillospira	---
OTU_1104	4	25	-1.23529	Poisson	0.000666457	0.00509241	Bacteroidetes	Bacteroidia	Bacteroidales	S24-7	---	---
OTU_355	14	33	-1.11765	NegBin	0.0262722	0.0889671	Actinobacteria	Coriobacteriia	Coriobacteriales	Coriobacteriaceae	---	---
OTU_1082	2	19	-1	Poisson	0.00245848	0.0145075	Bacteroidetes	Bacteroidia	Bacteroidales	S24-7	---	---
OTU_1022	4	21	-1	NegBin	0.0172332	0.0658397	Firmicutes	Clostridia	Clostridiales	---	---	---
OTU_1074	2	16	-0.823529	Poisson	0.00556123	0.027168	Bacteroidetes	Bacteroidia	Bacteroidales	S24-7	---	---
OTU_1034	5	17	-0.705882	Poisson	0.0161517	0.062509	Bacteroidetes	Bacteroidia	Bacteroidales	S24-7	---	---
OTU_644	24	28	-0.235294	ZI-NegBin	8.46609e-06	0.000144165	Firmicutes	Clostridia	Clostridiales	---	---	---
OTU_1133	22	26	-0.235294	ZI-NegBin	0.0241165	0.0826061	Firmicutes	Clostridia	Clostridiales	Lachnospiraceae	---	---
OTU_343	12	14	-0.117647	ZI-NegBin	0.00458208	0.0233412	Firmicutes	Clostridia	Clostridiales	Lachnospiraceae	---	---
	OTU Enriched in A20dDC vs. Cre-
	OTU Enriched in Cre- vs. A20dDC

## Sheet: Month 3
OTU ID	Total Reads (A20dDC)	Total Reads (Cre-)	Mean Read Difference (A20dDC minus Cre-)	Best Model	Best Model p value	Best Model q value	Phylum	Class	Order	Family	Genus	Species
OTU_4	29440	6695	1216.76	NegBin	9.02922e-05	0.00175342	Bacteroidetes	Bacteroidia	Bacteroidales	Bacteroidaceae	Bacteroides	acidifaciens
OTU_12	16769	363	958.489	NegBin	1.68073e-09	3.02339e-07	Bacteroidetes	Bacteroidia	Bacteroidales	Bacteroidaceae	Bacteroides	---
OTU_66	5582	715	273.353	ZI-NegBin	2.7552e-05	0.000663452	Bacteroidetes	Bacteroidia	Bacteroidales	S24-7	---	---
OTU_42	8335	3011	258.679	NegBin	7.66199e-07	2.97778e-05	Bacteroidetes	Bacteroidia	Bacteroidales	S24-7	---	---
OTU_41	5035	706	241.869	ZI-NegBin	0.00543031	0.0326905	Firmicutes	Clostridia	Clostridiales	Lachnospiraceae	---	---
OTU_29	5611	1520	213.136	NegBin	0.00270927	0.0211815	Deferribacteres	Deferribacteres	Deferribacterales	Deferribacteraceae	Mucispirillum	schaedleri
OTU_59	6416	2228	206.027	NegBin	0.00845097	0.0470324	Actinobacteria	Coriobacteriia	Coriobacteriales	Coriobacteriaceae	Adlercreutzia	---
OTU_33	3470	386	174.425	ZI-NegBin	7.77005e-08	5.1973e-06	Bacteroidetes	Bacteroidia	Bacteroidales	Prevotellaceae	Prevotella	---
OTU_53	3586	621	163.172	NegBin	0.000413006	0.0055251	Proteobacteria	Epsilonproteobacteria	Campylobacterales	Helicobacteraceae	Helicobacter	---
OTU_40	3580	651	160.511	NegBin	0.000656344	0.00773587	Proteobacteria	Epsilonproteobacteria	Campylobacterales	Helicobacteraceae	Helicobacter	---
OTU_65	2455	4	144.104	ZI-NegBin	0.000102076	0.00186212	Firmicutes	Clostridia	Clostridiales	Lachnospiraceae	---	---
OTU_26	6585	3234	138.584	ZI-NegBin	0.0158363	0.0735461	Proteobacteria	Betaproteobacteria	Burkholderiales	Alcaligenaceae	Sutterella	---
OTU_62	2151	16	125.299	NegBin	2.00889e-09	3.02339e-07	Bacteroidetes	Bacteroidia	Bacteroidales	Bacteroidaceae	Bacteroides	uniformis
OTU_60	3837	1356	121.398	ZI-NegBin	9.4916e-05	0.00178561	Bacteroidetes	Bacteroidia	Bacteroidales	S24-7	---	---
OTU_39	2953	778	113.86	NegBin	0.00286011	0.0217948	Bacteroidetes	Bacteroidia	Bacteroidales	Porphyromonadaceae	Parabacteroides	distasonis
OTU_655	1671	109	89.9095	ZI-NegBin	0.00228817	0.0188642	Bacteroidetes	Bacteroidia	Bacteroidales	S24-7	---	---
OTU_840	1110	7	64.7557	NegBin	2.5052e-08	1.88516e-06	Bacteroidetes	Bacteroidia	Bacteroidales	Bacteroidaceae	Bacteroides	ovatus
OTU_858	1037	9	60.3077	NegBin	8.97199e-09	9.00189e-07	Bacteroidetes	Bacteroidia	Bacteroidales	Bacteroidaceae	Bacteroides	---
OTU_876	1551	440	57.3891	NegBin	0.00257063	0.0203621	Bacteroidetes	Bacteroidia	Bacteroidales	Porphyromonadaceae	Parabacteroides	distasonis
OTU_76	1089	190	49.4434	ZI-NegBin	1.14863e-05	0.000327144	Bacteroidetes	Bacteroidia	Bacteroidales	S24-7	---	---
OTU_1140	802	16	45.9457	NegBin	7.91436e-07	2.97778e-05	Bacteroidetes	Bacteroidia	Bacteroidales	Bacteroidaceae	Bacteroides	---
OTU_43	1584	630	44.7149	ZI-NegBin	0.0163832	0.0752877	Bacteroidetes	Bacteroidia	Bacteroidales	Bacteroidaceae	Bacteroides	---
OTU_677	1040	255	41.5611	NegBin	0.000110074	0.00194896	Bacteroidetes	Bacteroidia	Bacteroidales	Bacteroidaceae	Bacteroides	acidifaciens
OTU_64	1497	622	40.2127	ZI-NegBin	0.0213934	0.0933246	Firmicutes	Clostridia	Clostridiales	Ruminococcaceae	---	---
OTU_562	692	27	38.629	NegBin	1.17383e-07	7.06646e-06	Bacteroidetes	Bacteroidia	Bacteroidales	Bacteroidaceae	Bacteroides	acidifaciens
OTU_672	749	114	35.2896	NegBin	0.000510603	0.00640382	Bacteroidetes	Bacteroidia	Bacteroidales	Bacteroidaceae	Bacteroides	acidifaciens
OTU_795	766	168	32.1357	NegBin	0.00152499	0.0137021	Firmicutes	Bacilli	Lactobacillales	Lactobacillaceae	Lactobacillus	---
OTU_104	807	210	31.3167	NegBin	0.00873866	0.0473555	Proteobacteria	Deltaproteobacteria	Desulfovibrionales	Desulfovibrionaceae	Desulfovibrio	---
OTU_1095	643	127	28.0543	ZI-NegBin	0.000372433	0.00521406	Bacteroidetes	Bacteroidia	Bacteroidales	Bacteroidaceae	Bacteroides	---
OTU_1092	546	61	27.4253	ZI-NegBin	0.000428885	0.0056128	Firmicutes	Clostridia	Clostridiales	Lachnospiraceae	---	---
OTU_148	986	403	27	ZI-NegBin	0.00567612	0.0338319	Actinobacteria	Coriobacteriia	Coriobacteriales	Coriobacteriaceae	Adlercreutzia	---
OTU_114	801	274	26.0407	ZI-NegBin	0.00371197	0.0262895	Bacteroidetes	Bacteroidia	Bacteroidales	---	---	---
OTU_673	610	138	25.267	ZI-NegBin	0.00120709	0.0117205	Bacteroidetes	Bacteroidia	Bacteroidales	Bacteroidaceae	Bacteroides	---
OTU_106	468	75	21.7602	NegBin	0.00127998	0.0120398	Bacteroidetes	Bacteroidia	Bacteroidales	Porphyromonadaceae	Parabacteroides	---
OTU_614	649	222	21.0995	NegBin	0.0121862	0.0611343	Actinobacteria	Coriobacteriia	Coriobacteriales	Coriobacteriaceae	Adlercreutzia	---
OTU_912	515	130	20.2941	NegBin	0.00319061	0.0231416	Deferribacteres	Deferribacteres	Deferribacterales	Deferribacteraceae	Mucispirillum	schaedleri
OTU_874	417	77	18.6063	NegBin	0.000762092	0.00834145	Bacteroidetes	Bacteroidia	Bacteroidales	Porphyromonadaceae	Parabacteroides	distasonis
OTU_674	412	86	17.6199	NegBin	0.000252006	0.00379269	Bacteroidetes	Bacteroidia	Bacteroidales	Bacteroidaceae	Bacteroides	acidifaciens
OTU_238	375	73	16.4434	NegBin	0.000461017	0.00590494	Actinobacteria	Coriobacteriia	Coriobacteriales	Coriobacteriaceae	Adlercreutzia	---
OTU_764	370	82	15.457	NegBin	0.00721944	0.0421952	Proteobacteria	Deltaproteobacteria	Desulfovibrionales	Desulfovibrionaceae	Desulfovibrio	---
OTU_389	390	100	15.2489	NegBin	0.00115935	0.0116321	Bacteroidetes	Bacteroidia	Bacteroidales	Bacteroidaceae	Bacteroides	---
OTU_812	378	94	15.0045	NegBin	0.00327243	0.0234524	Bacteroidetes	Bacteroidia	Bacteroidales	Bacteroidaceae	Bacteroides	acidifaciens
OTU_832	486	183	14.5113	ZI-NegBin	0.00103187	0.0108979	Bacteroidetes	Bacteroidia	Bacteroidales	Bacteroidaceae	Bacteroides	---
OTU_171	293	83	10.8507	ZI-NegBin	0.00413258	0.0282706	Firmicutes	Clostridia	Clostridiales	Lachnospiraceae	---	---
OTU_1166	235	41	10.6697	NegBin	0.000234565	0.00379269	Firmicutes	Bacilli	Lactobacillales	Lactobacillaceae	Lactobacillus	---
OTU_132	311	107	10.0633	ZI-NegBin	0.00851584	0.0470324	Firmicutes	Erysipelotrichi	Erysipelotrichales	Erysipelotrichaceae	Coprobacillus	---
OTU_790	218	41	9.66968	NegBin	0.00285502	0.0217948	Proteobacteria	Epsilonproteobacteria	Campylobacterales	Helicobacteraceae	Helicobacter	---
OTU_695	164	7	9.1086	NegBin	0.000629198	0.00757554	Bacteroidetes	Bacteroidia	Bacteroidales	Bacteroidaceae	Bacteroides	---
OTU_1110	172	27	8.04072	NegBin	0.00221959	0.0185583	Bacteroidetes	Bacteroidia	Bacteroidales	Prevotellaceae	Prevotella	---
OTU_645	174	37	7.38914	NegBin	0.0118319	0.060363	Bacteroidetes	Bacteroidia	Bacteroidales	Bacteroidaceae	Bacteroides	---
OTU_1061	184	51	6.90045	NegBin	0.0128342	0.0638527	Firmicutes	Bacilli	Lactobacillales	Lactobacillaceae	Lactobacillus	---
OTU_201	104	1	6.04072	NegBin	0.00192685	0.0165709	Firmicutes	Clostridia	Clostridiales	Ruminococcaceae	Anaerotruncus	---
OTU_1081	130	27	5.57014	NegBin	0.0154052	0.0724524	Deferribacteres	Deferribacteres	Deferribacterales	Deferribacteraceae	Mucispirillum	schaedleri
OTU_1179	91	11	4.50679	NegBin	0.0140317	0.0692382	Bacteroidetes	Bacteroidia	Bacteroidales	S24-7	---	---
OTU_1122	82	6	4.36199	NegBin	0.00487778	0.0305877	Firmicutes	Clostridia	Clostridiales	---	---	---
OTU_820	92	17	4.10407	NegBin	0.00135769	0.0123838	Firmicutes	Bacilli	Lactobacillales	Lactobacillaceae	Lactobacillus	---
OTU_158	145	60	3.91403	ZI-NegBin	0.00881033	0.0473555	Bacteroidetes	Bacteroidia	Bacteroidales	Rikenellaceae	---	---
OTU_292	89	18	3.85068	ZI-NegBin	0.000809851	0.0087059	Firmicutes	Clostridia	Clostridiales	Lachnospiraceae	---	---
OTU_525	63	1	3.62896	NegBin	0.00108765	0.0112891	Bacteroidetes	Bacteroidia	Bacteroidales	Bacteroidaceae	Bacteroides	---
OTU_422	77	12	3.60633	NegBin	0.00192352	0.0165709	Proteobacteria	Deltaproteobacteria	Desulfovibrionales	Desulfovibrionaceae	Desulfovibrio	---
OTU_806	66	4	3.57466	NegBin	0.00296997	0.0220508	Bacteroidetes	Bacteroidia	Bacteroidales	Bacteroidaceae	Bacteroides	uniformis
OTU_188	107	37	3.44796	ZI-NegBin	0.00513001	0.0315129	Firmicutes	Clostridia	Clostridiales	Lachnospiraceae	---	---
OTU_527	59	16	2.23982	NegBin	0.0166967	0.0755747	Bacteroidetes	Bacteroidia	Bacteroidales	Rikenellaceae	---	---
OTU_1039	68	26	2	NegBin	0.0149453	0.0713458	Bacteroidetes	Bacteroidia	Bacteroidales	S24-7	---	---
OTU_829	44	11	1.74208	ZI-NegBin	0.0102037	0.0526662	Bacteroidetes	Bacteroidia	Bacteroidales	S24-7	---	---
OTU_265	62	26	1.64706	ZI-NegBin	0.0166923	0.0755747	Firmicutes	Clostridia	Clostridiales	Ruminococcaceae	---	---
OTU_1089	28	5	1.26244	ZI-NegBin	0.00525675	0.0319653	Deferribacteres	Deferribacteres	Deferribacterales	Deferribacteraceae	Mucispirillum	schaedleri
OTU_1085	25	4	1.1629	ZI-NegBin	0.0121271	0.0611343	Firmicutes	Clostridia	Clostridiales	Lachnospiraceae	[Ruminococcus]	gnavus
OTU_1154	49	23	1.11312	ZI-NegBin	0.0075386	0.0428136	Actinobacteria	Coriobacteriia	Coriobacteriales	Coriobacteriaceae	Adlercreutzia	---
OTU_178	25	5	1.08597	ZI-NegBin	0.00447163	0.0289454	Tenericutes	Mollicutes	Mycoplasmatales	Mycoplasmataceae	---	---
OTU_270	179	125	0.914027	ZI-NegBin	0.0146007	0.070884	Firmicutes	Clostridia	Clostridiales	Ruminococcaceae	Ruminococcus	---
OTU_1051	34	25	0.0769231	ZI-NegBin	0.00665374	0.0392701	Firmicutes	Clostridia	Clostridiales	Lachnospiraceae	---	---
OTU_6	6474	53537	-3737.41	ZI-NegBin	7.2143e-07	2.97778e-05	Bacteroidetes	Bacteroidia	Bacteroidales	S24-7	---	---
OTU_27	4874	24032	-1561.91	ZI-NegBin	0.00502317	0.0311747	Firmicutes	Erysipelotrichi	Erysipelotrichales	Erysipelotrichaceae	Allobaculum	---
OTU_14	8945	18315	-882.67	NegBin	6.26425e-05	0.00130037	Bacteroidetes	Bacteroidia	Bacteroidales	S24-7	---	---
OTU_30	1558	11118	-763.584	ZI-NegBin	1.54575e-08	1.32934e-06	Bacteroidetes	Bacteroidia	Bacteroidales	S24-7	---	---
OTU_22	5564	9018	-366.398	NegBin	0.0150514	0.0713458	Bacteroidetes	Bacteroidia	Bacteroidales	S24-7	---	---
OTU_23	1616	5893	-358.249	ZI-NegBin	0.000407537	0.0055251	Proteobacteria	Epsilonproteobacteria	Campylobacterales	Helicobacteraceae	---	---
OTU_556	418	3264	-226.489	ZI-NegBin	5.27235e-06	0.000167111	Bacteroidetes	Bacteroidia	Bacteroidales	S24-7	---	---
OTU_24	2480	4189	-176.348	NegBin	0.0144334	0.0706416	Proteobacteria	Deltaproteobacteria	Desulfovibrionales	Desulfovibrionaceae	---	---
OTU_137	276	1819	-123.688	NegBin	1.19554e-05	0.000327144	Actinobacteria	Coriobacteriia	Coriobacteriales	Coriobacteriaceae	---	---
OTU_498	221	1731	-120.154	NegBin	0.000139251	0.00239511	Firmicutes	Erysipelotrichi	Erysipelotrichales	Erysipelotrichaceae	Allobaculum	---
OTU_80	1170	1933	-79.8688	ZI-NegBin	0.000622411	0.00757554	Bacteroidetes	Bacteroidia	Bacteroidales	S24-7	---	---
OTU_901	100	859	-60.1946	ZI-NegBin	0.00392392	0.0274674	Firmicutes	Erysipelotrichi	Erysipelotrichales	Erysipelotrichaceae	Allobaculum	---
OTU_521	49	690	-50.1946	ZI-NegBin	0.00032613	0.00478855	Firmicutes	Erysipelotrichi	Erysipelotrichales	Erysipelotrichaceae	Allobaculum	---
OTU_1002	129	721	-47.8733	ZI-NegBin	0.00113349	0.0115654	Bacteroidetes	Bacteroidia	Bacteroidales	S24-7	---	---
OTU_462	68	597	-41.9231	NegBin	0.00865714	0.0473555	Firmicutes	Clostridia	Clostridiales	---	---	---
OTU_489	100	568	-37.81	ZI-NegBin	5.25254e-05	0.00117112	Bacteroidetes	Bacteroidia	Bacteroidales	S24-7	---	---
OTU_1048	8	494	-37.5294	NegBin	3.31307e-05	0.000767103	Firmicutes	Clostridia	Clostridiales	---	---	---
OTU_687	52	480	-33.8643	NegBin	8.63944e-10	2.60047e-07	Bacteroidetes	Bacteroidia	Bacteroidales	S24-7	---	---
OTU_522	118	524	-33.3665	NegBin	0.00231885	0.0188642	Firmicutes	Erysipelotrichi	Erysipelotrichales	Erysipelotrichaceae	Allobaculum	---
OTU_918	411	653	-26.0543	NegBin	0.00894939	0.0476773	Actinobacteria	Actinobacteria	Bifidobacteriales	Bifidobacteriaceae	Bifidobacterium	---
OTU_802	73	385	-25.3213	NegBin	3.3877e-06	0.000119965	Bacteroidetes	Bacteroidia	Bacteroidales	S24-7	---	---
OTU_1040	275	524	-24.1312	NegBin	0.00431281	0.028852	Bacteroidetes	Bacteroidia	Bacteroidales	S24-7	---	---
OTU_392	67	343	-22.4434	NegBin	3.58705e-07	1.7995e-05	Proteobacteria	Epsilonproteobacteria	Campylobacterales	Helicobacteraceae	---	---
OTU_902	32	263	-18.3484	NegBin	5.91596e-05	0.00127193	Bacteroidetes	Bacteroidia	Bacteroidales	S24-7	---	---
OTU_716	37	248	-16.9005	NegBin	6.03912e-09	7.2711e-07	Bacteroidetes	Bacteroidia	Bacteroidales	S24-7	---	---
OTU_416	68	252	-15.3846	ZI-NegBin	0.000165225	0.00276293	Firmicutes	Clostridia	Clostridiales	Ruminococcaceae	Oscillospira	---
OTU_696	53	235	-14.9593	ZI-NegBin	8.35937e-05	0.00167745	Bacteroidetes	Bacteroidia	Bacteroidales	S24-7	---	---
OTU_404	19	156	-10.8824	NegBin	2.33278e-05	0.00058514	Firmicutes	Erysipelotrichi	Erysipelotrichales	Erysipelotrichaceae	Allobaculum	---
OTU_199	29	160	-10.6018	NegBin	7.68893e-07	2.97778e-05	Firmicutes	Clostridia	Clostridiales	---	---	---
OTU_544	5	127	-9.47511	NegBin	7.53684e-10	2.60047e-07	Bacteroidetes	Bacteroidia	Bacteroidales	S24-7	---	---
OTU_233	27	142	-9.33484	NegBin	0.00443722	0.0289454	Firmicutes	Clostridia	Clostridiales	Ruminococcaceae	Oscillospira	---
OTU_235	48	156	-9.17647	NegBin	0.00172437	0.0152658	Actinobacteria	Coriobacteriia	Coriobacteriales	Coriobacteriaceae	Adlercreutzia	---
OTU_274	12	119	-8.44796	NegBin	0.00299725	0.0220508	Firmicutes	Clostridia	Clostridiales	---	---	---
OTU_228	50	148	-8.44344	NegBin	0.0203238	0.0893059	Firmicutes	Clostridia	Clostridiales	Ruminococcaceae	Ruminococcus	---
OTU_222	107	189	-8.24434	NegBin	0.0185289	0.0820177	Firmicutes	Clostridia	Clostridiales	Ruminococcaceae	---	---
OTU_255	55	140	-7.53394	NegBin	0.00202059	0.0171323	Actinobacteria	Coriobacteriia	Coriobacteriales	Coriobacteriaceae	---	---
OTU_210	73	151	-7.32127	NegBin	0.00940993	0.0492589	Firmicutes	Clostridia	Clostridiales	Lachnospiraceae	---	---
OTU_209	12	104	-7.29412	NegBin	0.0102358	0.0526662	Cyanobacteria	4C0d-2	YS2	---	---	---
OTU_585	40	124	-7.18552	NegBin	0.00135573	0.0123838	Bacteroidetes	Bacteroidia	Bacteroidales	S24-7	---	---
OTU_398	1	93	-7.09502	NegBin	2.04321e-05	0.000534789	Firmicutes	Clostridia	Clostridiales	Ruminococcaceae	---	---
OTU_336	124	181	-6.62896	ZI-NegBin	0.00738234	0.0427324	Bacteroidetes	Bacteroidia	Bacteroidales	S24-7	---	---
OTU_288	17	97	-6.46154	NegBin	0.000668215	0.00773587	Actinobacteria	Coriobacteriia	Coriobacteriales	Coriobacteriaceae	Adlercreutzia	---
OTU_313	4	84	-6.22624	ZI-NegBin	0.00410099	0.0282706	Firmicutes	Clostridia	Clostridiales	Ruminococcaceae	---	---
OTU_68	23	77	-4.57014	NegBin	0.000713196	0.00795664	Chlamydiae	Chlamydiia	Chlamydiales	Chlamydiaceae	---	---
OTU_552	49	92	-4.19457	ZI-NegBin	0.0173846	0.0775226	Firmicutes	Clostridia	Clostridiales	Lachnospiraceae	Coprococcus	---
OTU_878	18	67	-4.09502	NegBin	0.0148067	0.0713091	Firmicutes	Clostridia	Clostridiales	---	---	---
OTU_725	8	57	-3.91403	NegBin	3.4553e-07	1.7995e-05	Bacteroidetes	Bacteroidia	Bacteroidales	S24-7	---	---
OTU_1010	20	66	-3.90045	NegBin	0.00748143	0.0428136	Firmicutes	Erysipelotrichi	Erysipelotrichales	Erysipelotrichaceae	Allobaculum	---
OTU_353	21	66	-3.84163	NegBin	0.0169758	0.0762646	Firmicutes	Clostridia	Clostridiales	Lachnospiraceae	---	---
OTU_1055	3	50	-3.66968	NegBin	5.27426e-06	0.000167111	Bacteroidetes	Bacteroidia	Bacteroidales	S24-7	---	---
OTU_364	44	81	-3.64253	NegBin	0.0158821	0.0735461	Proteobacteria	Deltaproteobacteria	Desulfovibrionales	Desulfovibrionaceae	---	---
OTU_959	19	60	-3.49774	NegBin	0.0030036	0.0220508	Proteobacteria	Epsilonproteobacteria	Campylobacterales	Helicobacteraceae	---	---
OTU_444	19	58	-3.34389	NegBin	0.0219585	0.0951006	Firmicutes	Clostridia	Clostridiales	---	---	---
OTU_260	13	48	-2.9276	NegBin	1.05394e-05	0.000317235	Firmicutes	Clostridia	Clostridiales	---	---	---
OTU_729	13	44	-2.61991	ZI-NegBin	0.00117898	0.0116352	Firmicutes	Clostridia	Clostridiales	---	---	---
OTU_828	19	48	-2.57466	NegBin	0.000360304	0.00516436	Bacteroidetes	Bacteroidia	Bacteroidales	S24-7	---	---
OTU_1041	22	50	-2.55204	NegBin	0.00790325	0.044465	Bacteroidetes	Bacteroidia	Bacteroidales	S24-7	---	---
OTU_1032	7	37	-2.43439	ZI-NegBin	0.00126897	0.0120398	Firmicutes	Clostridia	Clostridiales	---	---	---
OTU_450	1	27	-2.0181	NegBin	0.000713718	0.00795664	Bacteroidetes	Bacteroidia	Bacteroidales	S24-7	---	---
OTU_349	9	28	-1.62443	Poisson	0.000250136	0.00379269	Firmicutes	Clostridia	Clostridiales	---	---	---
OTU_320	3	22	-1.51584	Poisson	0.000239536	0.00379269	Firmicutes	Clostridia	Clostridiales	---	---	---
OTU_1104	11	28	-1.50679	NegBin	0.00487016	0.0305877	Bacteroidetes	Bacteroidia	Bacteroidales	S24-7	---	---
OTU_365	2	15	-1.0362	Poisson	0.00242127	0.0194348	Firmicutes	Clostridia	Clostridiales	---	---	---
OTU_1082	4	15	-0.918552	Poisson	0.0047201	0.0302287	Bacteroidetes	Bacteroidia	Bacteroidales	S24-7	---	---
OTU_1074	3	14	-0.900452	Poisson	0.00446535	0.0289454	Bacteroidetes	Bacteroidia	Bacteroidales	S24-7	---	---
OTU_1034	6	16	-0.877828	Poisson	0.00906861	0.0478886	Bacteroidetes	Bacteroidia	Bacteroidales	S24-7	---	---
OTU_131	72	62	-0.533937	ZI-NegBin	0.00431343	0.028852	Bacteroidetes	Bacteroidia	Bacteroidales	Rikenellaceae	---	---
	OTU Enriched in A20dDC vs. Cre-
	OTU Enriched in Cre- vs. A20dDC

## Sheet: Month 4
OTU ID	Total Reads (A20dDC)	Total Reads (Cre-)	Mean Read Difference (A20dDC minus Cre-)	Best Model	Best Model p value	Best Model q value	Phylum	Class	Order	Family	Genus	Species
OTU_1	109675	39788	3752.58	ZI-NegBin	0.0240052	0.0865038	Firmicutes	Bacilli	Lactobacillales	Lactobacillaceae	Lactobacillus	---
OTU_4	25978	6879	1038.58	NegBin	1.85495e-06	5.37935e-05	Bacteroidetes	Bacteroidia	Bacteroidales	Bacteroidaceae	Bacteroides	acidifaciens
OTU_12	16033	188	879.663	NegBin	7.15096e-10	1.08873e-07	Bacteroidetes	Bacteroidia	Bacteroidales	Bacteroidaceae	Bacteroides	---
OTU_18	10883	2082	482.141	NegBin	1.31262e-06	4.44104e-05	Bacteroidetes	Bacteroidia	Bacteroidales	Bacteroidaceae	Bacteroides	---
OTU_42	9415	3384	323.997	NegBin	2.28698e-07	1.16064e-05	Bacteroidetes	Bacteroidia	Bacteroidales	S24-7	---	---
OTU_43	3061	466	142.644	ZI-NegBin	6.46435e-06	0.000117303	Bacteroidetes	Bacteroidia	Bacteroidales	Bacteroidaceae	Bacteroides	---
OTU_39	3138	552	141.863	NegBin	1.58886e-06	4.88157e-05	Bacteroidetes	Bacteroidia	Bacteroidales	Porphyromonadaceae	Parabacteroides	distasonis
OTU_33	2992	621	129.693	ZI-NegBin	0.0247626	0.087677	Bacteroidetes	Bacteroidia	Bacteroidales	Prevotellaceae	Prevotella	---
OTU_59	4170	1735	129.608	NegBin	9.89681e-05	0.00115907	Actinobacteria	Coriobacteriia	Coriobacteriales	Coriobacteriaceae	Adlercreutzia	---
OTU_66	3538	1765	92.732	ZI-NegBin	0.0144958	0.0592481	Bacteroidetes	Bacteroidia	Bacteroidales	S24-7	---	---
OTU_712	2188	500	92.1438	NegBin	0.0150046	0.0609188	Firmicutes	Bacilli	Lactobacillales	Lactobacillaceae	Lactobacillus	reuteri
OTU_25	2230	577	89.9477	ZI-NegBin	0.00168667	0.0108125	Bacteroidetes	Bacteroidia	Bacteroidales	S24-7	---	---
OTU_876	1661	302	74.5131	NegBin	3.89333e-06	8.468e-05	Bacteroidetes	Bacteroidia	Bacteroidales	Porphyromonadaceae	Parabacteroides	distasonis
OTU_62	1205	4	66.7092	NegBin	2.29454e-10	4.65791e-08	Bacteroidetes	Bacteroidia	Bacteroidales	Bacteroidaceae	Bacteroides	uniformis
OTU_1095	1254	163	60.0784	ZI-NegBin	0.000135863	0.00137901	Bacteroidetes	Bacteroidia	Bacteroidales	Bacteroidaceae	Bacteroides	---
OTU_67	1424	499	49.7582	ZI-NegBin	4.56343e-05	0.000617584	Bacteroidetes	Bacteroidia	Bacteroidales	Rikenellaceae	AF12	---
OTU_673	1028	154	48.0523	NegBin	0.00122359	0.00837263	Bacteroidetes	Bacteroidia	Bacteroidales	Bacteroidaceae	Bacteroides	---
OTU_104	1134	300	45.3529	NegBin	0.000169431	0.00169153	Proteobacteria	Deltaproteobacteria	Desulfovibrionales	Desulfovibrionaceae	Desulfovibrio	---
OTU_76	1147	341	43.6634	NegBin	0.000530051	0.00413848	Bacteroidetes	Bacteroidia	Bacteroidales	S24-7	---	---
OTU_40	1367	574	42.1797	NegBin	0.011441	0.0497685	Proteobacteria	Epsilonproteobacteria	Campylobacterales	Helicobacteraceae	Helicobacter	---
OTU_672	871	116	41.5654	ZI-NegBin	6.69813e-08	5.09895e-06	Bacteroidetes	Bacteroidia	Bacteroidales	Bacteroidaceae	Bacteroides	acidifaciens
OTU_122	891	144	41.0294	NegBin	0.006861	0.0340115	Proteobacteria	Betaproteobacteria	Burkholderiales	Alcaligenaceae	Sutterella	---
OTU_655	911	163	41.0229	ZI-NegBin	0.000204982	0.00195621	Bacteroidetes	Bacteroidia	Bacteroidales	S24-7	---	---
OTU_840	730	10	39.9673	NegBin	1.73559e-07	1.11262e-05	Bacteroidetes	Bacteroidia	Bacteroidales	Bacteroidaceae	Bacteroides	ovatus
OTU_858	712	10	38.9673	NegBin	2.01176e-07	1.11379e-05	Bacteroidetes	Bacteroidia	Bacteroidales	Bacteroidaceae	Bacteroides	---
OTU_560	1042	353	37.1242	ZI-NegBin	0.0206143	0.0774944	Firmicutes	Bacilli	Lactobacillales	Lactobacillaceae	Lactobacillus	---
OTU_124	1036	386	34.8497	NegBin	0.00278224	0.0169438	Actinobacteria	Coriobacteriia	Coriobacteriales	Coriobacteriaceae	Adlercreutzia	---
OTU_677	892	261	34.2026	NegBin	6.54891e-06	0.000117303	Bacteroidetes	Bacteroidia	Bacteroidales	Bacteroidaceae	Bacteroides	acidifaciens
OTU_92	783	173	33.3235	ZI-NegBin	0.00343496	0.0199228	Firmicutes	Clostridia	Clostridiales	---	---	---
OTU_1140	604	13	32.7908	NegBin	1.13572e-06	4.32284e-05	Bacteroidetes	Bacteroidia	Bacteroidales	Bacteroidaceae	Bacteroides	---
OTU_832	721	176	29.7026	ZI-NegBin	2.45943e-06	5.99117e-05	Bacteroidetes	Bacteroidia	Bacteroidales	Bacteroidaceae	Bacteroides	---
OTU_130	874	350	27.9673	ZI-NegBin	0.00338298	0.0198099	Firmicutes	Clostridia	Clostridiales	---	---	---
OTU_562	521	44	26.3562	NegBin	5.24044e-06	0.000106381	Bacteroidetes	Bacteroidia	Bacteroidales	Bacteroidaceae	Bacteroides	acidifaciens
OTU_131	482	20	25.6013	NegBin	0.00509789	0.0274745	Bacteroidetes	Bacteroidia	Bacteroidales	Rikenellaceae	---	---
OTU_166	410	18	21.719	NegBin	0.00744046	0.0357787	Firmicutes	Clostridia	Clostridiales	---	---	---
OTU_764	496	121	20.4379	ZI-NegBin	1.29157e-05	0.000206991	Proteobacteria	Deltaproteobacteria	Desulfovibrionales	Desulfovibrionaceae	Desulfovibrio	---
OTU_338	954	566	19.7059	ZI-NegBin	0.0211349	0.0789643	Firmicutes	Clostridia	Clostridiales	Ruminococcaceae	Oscillospira	---
OTU_674	436	104	18.1046	NegBin	4.93981e-11	1.50417e-08	Bacteroidetes	Bacteroidia	Bacteroidales	Bacteroidaceae	Bacteroides	acidifaciens
OTU_614	514	197	16.9673	NegBin	0.000412753	0.00354038	Actinobacteria	Coriobacteriia	Coriobacteriales	Coriobacteriaceae	Adlercreutzia	---
OTU_106	326	48	15.2876	NegBin	6.84839e-06	0.000119162	Bacteroidetes	Bacteroidia	Bacteroidales	Porphyromonadaceae	Parabacteroides	---
OTU_100	489	208	14.9314	NegBin	0.0180955	0.0699581	Proteobacteria	Deltaproteobacteria	Desulfovibrionales	Desulfovibrionaceae	---	---
OTU_389	357	89	14.598	NegBin	5.4511e-07	2.43633e-05	Bacteroidetes	Bacteroidia	Bacteroidales	Bacteroidaceae	Bacteroides	---
OTU_874	352	87	14.4379	NegBin	0.0005929	0.00449754	Bacteroidetes	Bacteroidia	Bacteroidales	Porphyromonadaceae	Parabacteroides	distasonis
OTU_184	434	173	13.9346	ZI-NegBin	0.00319419	0.018886	Firmicutes	Bacilli	Lactobacillales	Streptococcaceae	Streptococcus	---
OTU_645	293	46	13.5719	NegBin	0.00134484	0.00910009	Bacteroidetes	Bacteroidia	Bacteroidales	Bacteroidaceae	Bacteroides	---
OTU_1061	290	94	10.5817	ZI-NegBin	0.0290845	0.0984026	Firmicutes	Bacilli	Lactobacillales	Lactobacillaceae	Lactobacillus	---
OTU_612	213	34	9.83333	ZI-NegBin	1.59975e-05	0.000249808	Bacteroidetes	Bacteroidia	Bacteroidales	Bacteroidaceae	Bacteroides	---
OTU_812	292	125	8.86928	NegBin	0.00113612	0.00786244	Bacteroidetes	Bacteroidia	Bacteroidales	Bacteroidaceae	Bacteroides	acidifaciens
OTU_767	172	29	7.84967	NegBin	6.90504e-05	0.000876076	Bacteroidetes	Bacteroidia	Bacteroidales	Porphyromonadaceae	Parabacteroides	distasonis
OTU_601	178	39	7.59477	ZI-NegBin	0.00527693	0.0281063	Firmicutes	Clostridia	Clostridiales	---	---	---
OTU_238	211	72	7.48693	NegBin	0.00218716	0.0137318	Actinobacteria	Coriobacteriia	Coriobacteriales	Coriobacteriaceae	Adlercreutzia	---
OTU_1180	144	17	7	ZI-NegBin	1.16483e-05	0.000191725	Bacteroidetes	Bacteroidia	Bacteroidales	Bacteroidaceae	Bacteroides	---
OTU_608	220	91	6.86928	NegBin	0.00310193	0.0185203	Bacteroidetes	Bacteroidia	Bacteroidales	Bacteroidaceae	Bacteroides	acidifaciens
OTU_367	124	7	6.47712	NegBin	0.00843844	0.0395308	Firmicutes	Bacilli	Lactobacillales	Enterococcaceae	Enterococcus	---
OTU_888	130	19	6.10458	ZI-NegBin	0.00032547	0.00291487	Firmicutes	Bacilli	Lactobacillales	Lactobacillaceae	Lactobacillus	---
OTU_422	114	14	5.5098	NegBin	1.60314e-06	4.88157e-05	Proteobacteria	Deltaproteobacteria	Desulfovibrionales	Desulfovibrionaceae	Desulfovibrio	---
OTU_695	102	4	5.43137	NegBin	2.21641e-06	5.86868e-05	Bacteroidetes	Bacteroidia	Bacteroidales	Bacteroidaceae	Bacteroides	---
OTU_511	108	23	4.64706	NegBin	0.00530743	0.0281063	Tenericutes	Mollicutes	Mycoplasmatales	Mycoplasmataceae	---	---
OTU_201	77	4	4.04248	NegBin	0.00208893	0.0132517	Firmicutes	Clostridia	Clostridiales	Ruminococcaceae	Anaerotruncus	---
OTU_790	101	32	3.72876	NegBin	0.00455001	0.0249636	Proteobacteria	Epsilonproteobacteria	Campylobacterales	Helicobacteraceae	Helicobacter	---
OTU_527	84	24	3.2549	NegBin	0.010954	0.0481602	Bacteroidetes	Bacteroidia	Bacteroidales	Rikenellaceae	---	---
OTU_1039	75	16	3.22549	NegBin	0.00011622	0.00126452	Bacteroidetes	Bacteroidia	Bacteroidales	S24-7	---	---
OTU_223	109	50	3.11438	ZI-NegBin	7.59869e-05	0.000944408	Firmicutes	Clostridia	Clostridiales	---	---	---
OTU_570	82	28	2.9085	NegBin	0.0070275	0.0344929	Firmicutes	Clostridia	Clostridiales	Lachnospiraceae	[Ruminococcus]	gnavus
OTU_386	111	57	2.81373	ZI-NegBin	0.0016243	0.0105234	Firmicutes	Clostridia	Clostridiales	Ruminococcaceae	Oscillospira	---
OTU_806	46	3	2.37908	NegBin	0.000117589	0.00126452	Bacteroidetes	Bacteroidia	Bacteroidales	Bacteroidaceae	Bacteroides	uniformis
OTU_854	66	25	2.19608	NegBin	0.0097415	0.044273	Actinobacteria	Coriobacteriia	Coriobacteriales	Coriobacteriaceae	Adlercreutzia	---
OTU_1138	112	71	2.04575	ZI-NegBin	0.0109922	0.0481602	Firmicutes	Clostridia	Clostridiales	---	---	---
OTU_1027	37	1	1.99673	NegBin	0.00139342	0.00932517	Bacteroidetes	Bacteroidia	Bacteroidales	Porphyromonadaceae	Parabacteroides	distasonis
OTU_185	38	9	1.5817	NegBin	0.0276831	0.0957899	Verrucomicrobia	Opitutae	HA64	---	---	---
OTU_925	85	58	1.31046	ZI-NegBin	0.0027336	0.0168158	Bacteroidetes	Bacteroidia	Bacteroidales	S24-7	---	---
OTU_615	26	4	1.20915	NegBin	0.01815	0.0699581	Firmicutes	Bacilli	Lactobacillales	Lactobacillaceae	Lactobacillus	---
OTU_257	109	83	1.1732	ZI-NegBin	0.0130621	0.0544851	Firmicutes	Clostridia	Clostridiales	Clostridiaceae	---	---
OTU_1165	22	2	1.10458	NegBin	0.00579675	0.0294185	Proteobacteria	Deltaproteobacteria	Desulfovibrionales	Desulfovibrionaceae	Desulfovibrio	---
OTU_1072	21	7	0.754902	Poisson	0.0170162	0.0668571	Proteobacteria	Epsilonproteobacteria	Campylobacterales	Helicobacteraceae	Helicobacter	---
OTU_746	12	2	0.54902	Poisson	0.0231394	0.0843824	Bacteroidetes	Bacteroidia	Bacteroidales	S24-7	---	---
OTU_27	6913	46760	-2366.53	NegBin	2.71437e-05	0.00038443	Firmicutes	Erysipelotrichi	Erysipelotrichales	Erysipelotrichaceae	Allobaculum	---
OTU_7	19767	51744	-1945.6	ZI-NegBin	9.33321e-05	0.0011145	Actinobacteria	Actinobacteria	Bifidobacteriales	Bifidobacteriaceae	Bifidobacterium	---
OTU_14	11887	24756	-795.846	NegBin	0.00388322	0.0221017	Bacteroidetes	Bacteroidia	Bacteroidales	S24-7	---	---
OTU_30	2249	12656	-619.526	ZI-NegBin	0.000114096	0.00126452	Bacteroidetes	Bacteroidia	Bacteroidales	S24-7	---	---
OTU_23	844	4147	-197.052	NegBin	0.000127856	0.00131973	Proteobacteria	Epsilonproteobacteria	Campylobacterales	Helicobacteraceae	---	---
OTU_117	94	2839	-161.778	NegBin	4.56057e-15	2.77739e-12	Firmicutes	Clostridia	Clostridiales	---	---	---
OTU_498	423	3070	-157.088	NegBin	8.61523e-06	0.000145741	Firmicutes	Erysipelotrichi	Erysipelotrichales	Erysipelotrichaceae	Allobaculum	---
OTU_807	1943	4408	-151.35	ZI-NegBin	0.000123422	0.00129593	Actinobacteria	Actinobacteria	Bifidobacteriales	Bifidobacteriaceae	Bifidobacterium	---
OTU_1006	416	2792	-141.124	NegBin	5.3847e-05	0.00069772	Firmicutes	Erysipelotrichi	Erysipelotrichales	Erysipelotrichaceae	Allobaculum	---
OTU_462	68	2170	-123.869	NegBin	1.24467e-06	4.44104e-05	Firmicutes	Clostridia	Clostridiales	---	---	---
OTU_46	2418	4256	-116.02	ZI-NegBin	0.0124037	0.0528919	Bacteroidetes	Bacteroidia	Bacteroidales	S24-7	---	---
OTU_901	141	1797	-97.8725	NegBin	0.00746124	0.0357787	Firmicutes	Erysipelotrichi	Erysipelotrichales	Erysipelotrichaceae	Allobaculum	---
OTU_123	215	1633	-84.1144	NegBin	1.95319e-05	0.000297373	Firmicutes	Clostridia	Clostridiales	---	---	---
OTU_93	733	2027	-78.5131	NegBin	0.00296309	0.0178666	Firmicutes	Clostridia	Clostridiales	Lachnospiraceae	---	---
OTU_793	758	1810	-64.3595	ZI-NegBin	0.000208791	0.00195621	Actinobacteria	Actinobacteria	Bifidobacteriales	Bifidobacteriaceae	Bifidobacterium	---
OTU_376	150	1224	-63.6667	NegBin	0.0286358	0.0984026	Firmicutes	Clostridia	Clostridiales	---	---	---
OTU_569	707	1701	-60.781	ZI-NegBin	2.82125e-05	0.000390487	Actinobacteria	Actinobacteria	Bifidobacteriales	Bifidobacteriaceae	Bifidobacterium	---
OTU_962	1839	2764	-60.4216	NegBin	0.0254458	0.0890602	Bacteroidetes	Bacteroidia	Bacteroidales	S24-7	---	---
OTU_80	1069	2002	-58.3758	ZI-NegBin	0.00803816	0.0379476	Bacteroidetes	Bacteroidia	Bacteroidales	S24-7	---	---
OTU_521	102	1074	-57.5098	NegBin	0.0167666	0.0667375	Firmicutes	Erysipelotrichi	Erysipelotrichales	Erysipelotrichaceae	Allobaculum	---
OTU_522	162	1008	-50.2941	NegBin	4.83281e-05	0.000639822	Firmicutes	Erysipelotrichi	Erysipelotrichales	Erysipelotrichaceae	Allobaculum	---
OTU_142	90	758	-39.5882	ZI-NegBin	0.0124196	0.0528919	Firmicutes	Clostridia	Clostridiales	---	---	---
OTU_477	406	966	-34.268	NegBin	0.000492357	0.00399794	Actinobacteria	Actinobacteria	Bifidobacteriales	Bifidobacteriaceae	Bifidobacterium	---
OTU_133	276	838	-33.9608	NegBin	0.000213707	0.00197193	Firmicutes	Clostridia	Clostridiales	---	---	---
OTU_687	219	680	-27.8333	NegBin	0.00753364	0.0358436	Bacteroidetes	Bacteroidia	Bacteroidales	S24-7	---	---
OTU_782	32	494	-27.281	ZI-NegBin	0.000241655	0.00219654	Bacteroidetes	Bacteroidia	Bacteroidales	S24-7	---	---
OTU_918	299	697	-24.3889	NegBin	0.0023827	0.0148068	Actinobacteria	Actinobacteria	Bifidobacteriales	Bifidobacteriaceae	Bifidobacterium	---
OTU_102	47	428	-22.5654	NegBin	0.000671627	0.00498806	Firmicutes	Clostridia	Clostridiales	Lachnospiraceae	---	---
OTU_489	273	625	-21.598	NegBin	0.0179587	0.0699581	Bacteroidetes	Bacteroidia	Bacteroidales	S24-7	---	---
OTU_545	176	520	-20.8105	NegBin	6.2163e-06	0.000117303	Actinobacteria	Actinobacteria	Bifidobacteriales	Bifidobacteriaceae	Bifidobacterium	---
OTU_228	91	423	-19.8268	NegBin	0.00102805	0.00728002	Firmicutes	Clostridia	Clostridiales	Ruminococcaceae	Ruminococcus	---
OTU_332	102	424	-19.2745	NegBin	0.000361327	0.00318911	Firmicutes	Clostridia	Clostridiales	Lachnospiraceae	---	---
OTU_1048	21	310	-17.0686	ZI-NegBin	3.19848e-08	3.24645e-06	Firmicutes	Clostridia	Clostridiales	---	---	---
OTU_235	26	314	-17.0261	NegBin	9.10149e-10	1.10856e-07	Actinobacteria	Coriobacteriia	Coriobacteriales	Coriobacteriaceae	Adlercreutzia	---
OTU_1135	13	299	-16.866	NegBin	0.000173366	0.0017029	Firmicutes	Erysipelotrichi	Erysipelotrichales	Erysipelotrichaceae	Allobaculum	---
OTU_287	194	459	-16.2222	ZI-NegBin	0.0195454	0.0739324	Firmicutes	Clostridia	Clostridiales	Lachnospiraceae	---	---
OTU_546	76	342	-15.8954	NegBin	0.0167107	0.0667375	Firmicutes	Clostridia	Clostridiales	---	---	---
OTU_1167	106	346	-14.4641	NegBin	0.0104444	0.0467694	Firmicutes	Bacilli	Lactobacillales	Lactobacillaceae	Lactobacillus	---
OTU_716	94	329	-14.1307	NegBin	0.000431792	0.00359995	Bacteroidetes	Bacteroidia	Bacteroidales	S24-7	---	---
OTU_353	29	256	-13.4477	NegBin	8.32955e-05	0.00101454	Firmicutes	Clostridia	Clostridiales	Lachnospiraceae	---	---
OTU_170	114	333	-13.2549	NegBin	0.0245413	0.087677	Firmicutes	Clostridia	Clostridiales	Ruminococcaceae	Ruminococcus	---
OTU_404	32	249	-12.8693	NegBin	6.37583e-06	0.000117303	Firmicutes	Erysipelotrichi	Erysipelotrichales	Erysipelotrichaceae	Allobaculum	---
OTU_288	20	221	-11.8889	NegBin	0.000101231	0.0011632	Actinobacteria	Coriobacteriia	Coriobacteriales	Coriobacteriaceae	Adlercreutzia	---
OTU_392	35	235	-11.8791	NegBin	2.12701e-06	5.86868e-05	Proteobacteria	Epsilonproteobacteria	Campylobacterales	Helicobacteraceae	---	---
OTU_416	97	292	-11.7876	NegBin	0.000598196	0.00449754	Firmicutes	Clostridia	Clostridiales	Ruminococcaceae	Oscillospira	---
OTU_421	50	233	-10.9281	NegBin	0.00043306	0.00359995	Firmicutes	Clostridia	Clostridiales	---	---	---
OTU_181	117	296	-10.9118	NegBin	0.0258044	0.0897993	Firmicutes	Clostridia	Clostridiales	---	---	---
OTU_536	35	216	-10.7614	NegBin	0.00144637	0.00957436	Firmicutes	Clostridia	Clostridiales	---	---	---
OTU_199	37	217	-10.7092	NegBin	0.000521168	0.00413848	Firmicutes	Clostridia	Clostridiales	---	---	---
OTU_209	24	184	-9.4902	NegBin	0.000437433	0.00359995	Cyanobacteria	4C0d-2	YS2	---	---	---
OTU_219	97	249	-9.25817	NegBin	0.00933401	0.0427399	Firmicutes	Clostridia	Clostridiales	---	---	---
OTU_274	3	153	-8.83333	NegBin	5.60075e-07	2.43633e-05	Firmicutes	Clostridia	Clostridiales	---	---	---
OTU_313	6	147	-8.31373	NegBin	2.85661e-06	6.60894e-05	Firmicutes	Clostridia	Clostridiales	Ruminococcaceae	---	---
OTU_230	58	195	-8.24837	NegBin	0.000385927	0.00335756	Firmicutes	Clostridia	Clostridiales	Ruminococcaceae	---	---
OTU_342	20	145	-7.4183	NegBin	0.0129732	0.0544851	Firmicutes	Clostridia	Clostridiales	---	---	---
OTU_492	33	154	-7.22549	NegBin	0.000818577	0.00600619	Firmicutes	Clostridia	Clostridiales	---	---	---
OTU_279	36	156	-7.17647	NegBin	0.000941688	0.00674692	Firmicutes	Clostridia	Clostridiales	Lachnospiraceae	---	---
OTU_1010	32	152	-7.1634	NegBin	0.00361068	0.0207444	Firmicutes	Erysipelotrichi	Erysipelotrichales	Erysipelotrichaceae	Allobaculum	---
OTU_1015	35	143	-6.46732	NegBin	0.00536983	0.0281916	Firmicutes	Clostridia	Clostridiales	---	---	---
OTU_312	2	109	-6.30065	NegBin	2.08532e-05	0.000309747	Firmicutes	Clostridia	Clostridiales	Ruminococcaceae	---	---
OTU_224	55	156	-6.12092	NegBin	0.022377	0.0825916	Firmicutes	Clostridia	Clostridiales	Lachnospiraceae	Coprococcus	---
OTU_113	5	108	-6.07516	NegBin	1.82696e-07	1.11262e-05	Tenericutes	Mollicutes	Mycoplasmatales	Mycoplasmataceae	---	---
OTU_651	57	157	-6.06863	ZI-NegBin	4.75442e-08	4.13634e-06	Actinobacteria	Actinobacteria	Bifidobacteriales	Bifidobacteriaceae	Bifidobacterium	---
OTU_234	57	152	-5.77451	ZI-NegBin	0.012619	0.053368	Firmicutes	Clostridia	Clostridiales	Peptococcaceae	---	---
OTU_747	4	99	-5.60131	NegBin	0.00109674	0.00767721	Firmicutes	Erysipelotrichi	Erysipelotrichales	Erysipelotrichaceae	Allobaculum	---
OTU_220	5	99	-5.54575	ZI-NegBin	2.93007e-06	6.60894e-05	Firmicutes	Bacilli	Bacillales	Staphylococcaceae	Staphylococcus	sciuri
OTU_1078	57	148	-5.53922	NegBin	0.0213197	0.0791687	Firmicutes	Clostridia	Clostridiales	---	---	---
OTU_508	4	97	-5.48366	NegBin	0.000829224	0.00601187	Firmicutes	Erysipelotrichi	Erysipelotrichales	Erysipelotrichaceae	Allobaculum	---
OTU_255	30	119	-5.33333	NegBin	0.00598907	0.0301433	Actinobacteria	Coriobacteriia	Coriobacteriales	Coriobacteriaceae	---	---
OTU_420	17	100	-4.93791	NegBin	0.028991	0.0984026	Firmicutes	Clostridia	Clostridiales	Lachnospiraceae	---	---
OTU_227	31	109	-4.68954	ZI-NegBin	0.0103704	0.0467694	Bacteroidetes	Bacteroidia	Bacteroidales	Rikenellaceae	---	---
OTU_369	70	145	-4.64052	NegBin	0.0191274	0.0728921	Firmicutes	Clostridia	Clostridiales	---	---	---
OTU_233	22	97	-4.48366	NegBin	0.0246244	0.087677	Firmicutes	Clostridia	Clostridiales	Ruminococcaceae	Oscillospira	---
OTU_398	12	86	-4.39216	NegBin	0.00686932	0.0340115	Firmicutes	Clostridia	Clostridiales	Ruminococcaceae	---	---
OTU_260	8	82	-4.37908	NegBin	4.31405e-06	9.0595e-05	Firmicutes	Clostridia	Clostridiales	---	---	---
OTU_826	100	168	-4.3268	NegBin	0.0191506	0.0728921	Bacteroidetes	Bacteroidia	Bacteroidales	S24-7	---	---
OTU_253	55	121	-4.06209	NegBin	0.00562295	0.0290077	Bacteroidetes	Bacteroidia	Bacteroidales	S24-7	---	---
OTU_263	41	105	-3.89869	NegBin	0.00155617	0.0101904	Actinobacteria	Coriobacteriia	Coriobacteriales	Coriobacteriaceae	Adlercreutzia	---
OTU_259	41	105	-3.89869	NegBin	0.00913042	0.042446	Firmicutes	Clostridia	Clostridiales	Lachnospiraceae	---	---
OTU_729	28	92	-3.85621	NegBin	0.0041293	0.0232847	Firmicutes	Clostridia	Clostridiales	---	---	---
OTU_391	8	72	-3.79085	NegBin	0.000207891	0.00195621	Firmicutes	Clostridia	Clostridiales	---	---	---
OTU_326	17	80	-3.76144	NegBin	0.000588637	0.00449754	Actinobacteria	Coriobacteriia	Coriobacteriales	Coriobacteriaceae	Adlercreutzia	---
OTU_574	29	87	-3.50654	NegBin	0.0238352	0.0864028	Firmicutes	Clostridia	Clostridiales	---	---	---
OTU_280	34	91	-3.46405	NegBin	0.0294706	0.0991579	Firmicutes	Clostridia	Clostridiales	Lachnospiraceae	Coprococcus	---
OTU_589	9	66	-3.38235	NegBin	2.42104e-06	5.99117e-05	Firmicutes	Clostridia	Clostridiales	Lachnospiraceae	---	---
OTU_311	11	66	-3.27124	ZI-NegBin	0.0142019	0.058439	Firmicutes	Clostridia	Clostridiales	Lachnospiraceae	Coprococcus	---
OTU_359	5	57	-3.07516	NegBin	2.59366e-05	0.000376081	Actinobacteria	Coriobacteriia	Coriobacteriales	Coriobacteriaceae	Adlercreutzia	---
OTU_325	1	50	-2.88562	NegBin	0.000528275	0.00413848	Firmicutes	Clostridia	Clostridiales	---	---	---
OTU_959	16	63	-2.81699	NegBin	0.000118354	0.00126452	Proteobacteria	Epsilonproteobacteria	Campylobacterales	Helicobacteraceae	---	---
OTU_401	40	78	-2.36601	ZI-NegBin	0.00925721	0.0427094	Firmicutes	Clostridia	Clostridiales	Ruminococcaceae	---	---
OTU_725	33	71	-2.34314	NegBin	0.0226705	0.0831707	Bacteroidetes	Bacteroidia	Bacteroidales	S24-7	---	---
OTU_340	12	50	-2.27451	NegBin	0.00707982	0.0344929	Firmicutes	Clostridia	Clostridiales	Ruminococcaceae	---	---
OTU_1051	6	37	-1.84314	NegBin	0.00432193	0.0241473	Firmicutes	Clostridia	Clostridiales	Lachnospiraceae	---	---
OTU_539	10	38	-1.67974	NegBin	0.00453515	0.0249636	Firmicutes	Clostridia	Clostridiales	Ruminococcaceae	Ruminococcus	---
OTU_688	23	50	-1.6634	NegBin	0.0290313	0.0984026	Bacteroidetes	Bacteroidia	Bacteroidales	S24-7	---	---
OTU_365	7	30	-1.37582	NegBin	0.00566817	0.0290077	Firmicutes	Clostridia	Clostridiales	---	---	---
OTU_306	10	32	-1.3268	NegBin	0.0251529	0.0885442	Bacteroidetes	Bacteroidia	Bacteroidales	Rikenellaceae	---	---
OTU_355	14	35	-1.28105	NegBin	0.0169923	0.0668571	Actinobacteria	Coriobacteriia	Coriobacteriales	Coriobacteriaceae	---	---
OTU_317	10	29	-1.15033	NegBin	0.0107115	0.0476155	Firmicutes	Clostridia	Clostridiales	Ruminococcaceae	---	---
OTU_349	9	25	-0.970588	NegBin	0.0164803	0.066467	Firmicutes	Clostridia	Clostridiales	---	---	---
OTU_357	2	18	-0.947712	NegBin	0.0135627	0.0561883	Firmicutes	Clostridia	Clostridiales	Ruminococcaceae	---	---
OTU_1104	5	19	-0.839869	Poisson	0.00560752	0.0290077	Bacteroidetes	Bacteroidia	Bacteroidales	S24-7	---	---
OTU_1074	4	18	-0.836601	Poisson	0.00473411	0.0257417	Bacteroidetes	Bacteroidia	Bacteroidales	S24-7	---	---
OTU_758	3	14	-0.656863	Poisson	0.0120239	0.0519332	Firmicutes	Clostridia	Clostridiales	Ruminococcaceae	Oscillospira	---
OTU_701	9	19	-0.617647	ZI-NegBin	0.029851	0.099886	Firmicutes	Clostridia	Clostridiales	Lachnospiraceae	Coprococcus	---
OTU_450	27	33	-0.441176	ZI-NegBin	6.14261e-07	2.4939e-05	Bacteroidetes	Bacteroidia	Bacteroidales	S24-7	---	---
	OTU Enriched in A20dDC vs. Cre-
	OTU Enriched in Cre- vs. A20dDC

## Sheet: Month 5
OTU ID	Total Reads (A20dDC)	Total Reads (Cre-)	Mean Read Difference (A20dDC minus Cre-)	Best Model	Best Model p value	Best Model q value	Phylum	Class	Order	Family	Genus	Species
OTU_1	78743	18442	3691.97	ZI-NegBin	0.00324291	0.0184876	Firmicutes	Bacilli	Lactobacillales	Lactobacillaceae	Lactobacillus	---
OTU_11	52027	5453	2888.15	ZI-NegBin	0.00952417	0.0440132	Firmicutes	Bacilli	Lactobacillales	Lactobacillaceae	Lactobacillus	---
OTU_12	22612	439	1383.98	NegBin	9.823e-10	2.99602e-07	Bacteroidetes	Bacteroidia	Bacteroidales	Bacteroidaceae	Bacteroides	---
OTU_4	30879	11068	1192.07	NegBin	0.000372669	0.00398822	Bacteroidetes	Bacteroidia	Bacteroidales	Bacteroidaceae	Bacteroides	acidifaciens
OTU_19	27454	8044	1179.61	ZI-NegBin	0.0280615	0.0956286	Firmicutes	Bacilli	Lactobacillales	Lactobacillaceae	Lactobacillus	reuteri
OTU_449	6013	1398	282.613	ZI-NegBin	0.0114414	0.0494982	Firmicutes	Bacilli	Lactobacillales	Lactobacillaceae	Lactobacillus	---
OTU_42	7396	3522	227.45	NegBin	0.00686173	0.0334853	Bacteroidetes	Bacteroidia	Bacteroidales	S24-7	---	---
OTU_66	4259	1102	192.721	ZI-NegBin	0.00109197	0.00853974	Bacteroidetes	Bacteroidia	Bacteroidales	S24-7	---	---
OTU_62	2374	22	146.908	NegBin	6.73529e-08	5.13566e-06	Bacteroidetes	Bacteroidia	Bacteroidales	Bacteroidaceae	Bacteroides	uniformis
OTU_39	2691	675	123.188	NegBin	5.98274e-05	0.00110586	Bacteroidetes	Bacteroidia	Bacteroidales	Porphyromonadaceae	Parabacteroides	distasonis
OTU_240	2706	787	116.658	NegBin	0.00227314	0.0141491	Firmicutes	Clostridia	Clostridiales	---	---	---
OTU_538	2000	249	108.4	NegBin	0.00514013	0.0275042	Firmicutes	Bacilli	Lactobacillales	Lactobacillaceae	Lactobacillus	---
OTU_33	3740	2002	100.283	ZI-NegBin	0.00617719	0.0311412	Bacteroidetes	Bacteroidia	Bacteroidales	Prevotellaceae	Prevotella	---
OTU_712	1608	125	92.1667	ZI-NegBin	2.2787e-05	0.000556004	Firmicutes	Bacilli	Lactobacillales	Lactobacillaceae	Lactobacillus	reuteri
OTU_840	1317	18	81.1125	NegBin	1.93744e-07	1.18246e-05	Bacteroidetes	Bacteroidia	Bacteroidales	Bacteroidaceae	Bacteroides	ovatus
OTU_858	1191	19	73.1708	NegBin	3.01618e-07	1.41529e-05	Bacteroidetes	Bacteroidia	Bacteroidales	Bacteroidaceae	Bacteroides	---
OTU_104	1390	276	68.475	NegBin	8.29855e-05	0.00134397	Proteobacteria	Deltaproteobacteria	Desulfovibrionales	Desulfovibrionaceae	Desulfovibrio	---
OTU_876	1375	367	61.4708	NegBin	5.43092e-05	0.00110429	Bacteroidetes	Bacteroidia	Bacteroidales	Porphyromonadaceae	Parabacteroides	distasonis
OTU_1140	985	13	60.6958	NegBin	3.21638e-10	1.96199e-07	Bacteroidetes	Bacteroidia	Bacteroidales	Bacteroidaceae	Bacteroides	---
OTU_88	1657	737	54.4292	ZI-NegBin	0.0202872	0.0790532	Firmicutes	Clostridia	Clostridiales	Ruminococcaceae	Ruminococcus	---
OTU_672	1242	353	54.0917	NegBin	0.00635649	0.0315241	Bacteroidetes	Bacteroidia	Bacteroidales	Bacteroidaceae	Bacteroides	acidifaciens
OTU_655	1024	152	53.8667	ZI-NegBin	0.0106157	0.0479672	Bacteroidetes	Bacteroidia	Bacteroidales	S24-7	---	---
OTU_562	792	40	46.8333	NegBin	1.70521e-08	2.60022e-06	Bacteroidetes	Bacteroidia	Bacteroidales	Bacteroidaceae	Bacteroides	acidifaciens
OTU_795	1070	334	44.6083	NegBin	0.00874893	0.0410527	Firmicutes	Bacilli	Lactobacillales	Lactobacillaceae	Lactobacillus	---
OTU_1092	796	88	43.8833	ZI-NegBin	0.0112433	0.0494141	Firmicutes	Clostridia	Clostridiales	Lachnospiraceae	---	---
OTU_677	1155	432	43.3875	NegBin	0.000931381	0.00747555	Bacteroidetes	Bacteroidia	Bacteroidales	Bacteroidaceae	Bacteroides	acidifaciens
OTU_873	845	157	42.3458	NegBin	0.022149	0.0839185	Firmicutes	Bacilli	Lactobacillales	Lactobacillaceae	Lactobacillus	---
OTU_560	820	190	38.5833	ZI-NegBin	0.00166688	0.0114253	Firmicutes	Bacilli	Lactobacillales	Lactobacillaceae	Lactobacillus	---
OTU_96	1144	574	33.2333	ZI-NegBin	0.0218972	0.083555	Firmicutes	Clostridia	Clostridiales	Lachnospiraceae	---	---
OTU_656	572	71	31.0167	ZI-NegBin	0.0184679	0.0731521	Firmicutes	Bacilli	Lactobacillales	Lactobacillaceae	Lactobacillus	---
OTU_106	575	154	25.6708	NegBin	0.0113409	0.0494141	Bacteroidetes	Bacteroidia	Bacteroidales	Porphyromonadaceae	Parabacteroides	---
OTU_764	536	124	25.2333	NegBin	0.0020233	0.0131299	Proteobacteria	Deltaproteobacteria	Desulfovibrionales	Desulfovibrionaceae	Desulfovibrio	---
OTU_674	492	119	22.8167	NegBin	2.32615e-07	1.18246e-05	Bacteroidetes	Bacteroidia	Bacteroidales	Bacteroidaceae	Bacteroides	acidifaciens
OTU_100	606	275	19.5417	NegBin	0.0241305	0.0876167	Proteobacteria	Deltaproteobacteria	Desulfovibrionales	Desulfovibrionaceae	---	---
OTU_389	446	152	17.7417	NegBin	0.000522413	0.00514649	Bacteroidetes	Bacteroidia	Bacteroidales	Bacteroidaceae	Bacteroides	---
OTU_1061	318	38	17.3417	NegBin	1.43564e-05	0.000417018	Firmicutes	Bacilli	Lactobacillales	Lactobacillaceae	Lactobacillus	---
OTU_874	353	71	17.3292	NegBin	5.0503e-05	0.0010623	Bacteroidetes	Bacteroidia	Bacteroidales	Porphyromonadaceae	Parabacteroides	distasonis
OTU_35	535	260	16.1042	ZI-NegBin	0.0112791	0.0494141	Firmicutes	Clostridia	Clostridiales	Lachnospiraceae	---	---
OTU_367	206	11	12.1417	NegBin	0.016789	0.0678231	Firmicutes	Bacilli	Lactobacillales	Enterococcaceae	Enterococcus	---
OTU_982	201	34	10.2958	ZI-NegBin	0.00194696	0.0129097	Firmicutes	Bacilli	Lactobacillales	Lactobacillaceae	Lactobacillus	---
OTU_812	285	131	9.07917	NegBin	0.0277795	0.0952254	Bacteroidetes	Bacteroidia	Bacteroidales	Bacteroidaceae	Bacteroides	acidifaciens
OTU_695	143	6	8.5375	NegBin	3.9909e-05	0.000936326	Bacteroidetes	Bacteroidia	Bacteroidales	Bacteroidaceae	Bacteroides	---
OTU_131	128	2	7.86667	NegBin	0.000723585	0.00658787	Bacteroidetes	Bacteroidia	Bacteroidales	Rikenellaceae	---	---
OTU_245	213	99	6.7125	ZI-NegBin	0.0246866	0.0885814	Firmicutes	Clostridia	Clostridiales	Lachnospiraceae	[Ruminococcus]	gnavus
OTU_238	155	49	6.42083	NegBin	0.00137709	0.0100003	Actinobacteria	Coriobacteriia	Coriobacteriales	Coriobacteriaceae	Adlercreutzia	---
OTU_767	129	27	6.2625	NegBin	0.000342469	0.0038852	Bacteroidetes	Bacteroidia	Bacteroidales	Porphyromonadaceae	Parabacteroides	distasonis
OTU_888	112	13	6.13333	NegBin	0.000168671	0.00223672	Firmicutes	Bacilli	Lactobacillales	Lactobacillaceae	Lactobacillus	---
OTU_200	224	120	6	ZI-NegBin	0.0277871	0.0952254	Firmicutes	Clostridia	Clostridiales	Ruminococcaceae	Ruminococcus	---
OTU_422	119	23	5.90417	NegBin	0.00080462	0.00701169	Proteobacteria	Deltaproteobacteria	Desulfovibrionales	Desulfovibrionaceae	Desulfovibrio	---
OTU_223	148	56	5.51667	NegBin	0.0255685	0.0902732	Firmicutes	Clostridia	Clostridiales	---	---	---
OTU_511	116	28	5.38333	ZI-NegBin	3.04185e-06	0.000109149	Tenericutes	Mollicutes	Mycoplasmatales	Mycoplasmataceae	---	---
OTU_702	468	368	4.71667	ZI-NegBin	0.012162	0.05188	Firmicutes	Clostridia	Clostridiales	---	---	---
OTU_265	110	40	4.20833	ZI-NegBin	5.99242e-05	0.00110586	Firmicutes	Clostridia	Clostridiales	Ruminococcaceae	---	---
OTU_636	128	59	4.06667	ZI-NegBin	0.0111708	0.0494141	Firmicutes	Clostridia	Clostridiales	Lachnospiraceae	---	---
OTU_794	68	10	3.58333	NegBin	0.011147	0.0494141	Firmicutes	Clostridia	Clostridiales	Lachnospiraceae	---	---
OTU_570	95	41	3.20417	NegBin	0.0227163	0.0850118	Firmicutes	Clostridia	Clostridiales	Lachnospiraceae	[Ruminococcus]	gnavus
OTU_806	55	5	3.10417	NegBin	0.000821077	0.00705432	Bacteroidetes	Bacteroidia	Bacteroidales	Bacteroidaceae	Bacteroides	uniformis
OTU_386	155	109	2.42083	ZI-NegBin	0.0271565	0.0941218	Firmicutes	Clostridia	Clostridiales	Ruminococcaceae	Oscillospira	---
OTU_252	92	51	2.35	ZI-NegBin	0.0230042	0.0851799	Firmicutes	Clostridia	Clostridiales	Ruminococcaceae	---	---
OTU_817	39	3	2.2375	ZI-NegBin	0.000359498	0.00391597	Firmicutes	Bacilli	Lactobacillales	Lactobacillaceae	Lactobacillus	---
OTU_485	72	34	2.23333	ZI-NegBin	0.0234234	0.086074	Firmicutes	Clostridia	Clostridiales	---	---	---
OTU_1031	43	10	2.02083	NegBin	0.0219161	0.083555	Firmicutes	Clostridia	Clostridiales	Lachnospiraceae	---	---
OTU_1148	34	2	1.99167	NegBin	0.00121483	0.00914869	Firmicutes	Bacilli	Lactobacillales	Lactobacillaceae	Lactobacillus	---
OTU_1179	56	23	1.96667	ZI-NegBin	0.00220919	0.0138928	Bacteroidetes	Bacteroidia	Bacteroidales	S24-7	---	---
OTU_185	35	6	1.7875	NegBin	0.00440246	0.0241937	Verrucomicrobia	Opitutae	HA64	---	---	---
OTU_704	53	25	1.64583	ZI-NegBin	0.0046213	0.0249468	Bacteroidetes	Bacteroidia	Bacteroidales	S24-7	---	---
OTU_342	65	41	1.32917	ZI-NegBin	2.13133e-08	2.60022e-06	Firmicutes	Clostridia	Clostridiales	---	---	---
OTU_587	25	4	1.29583	NegBin	0.00453565	0.0247031	Firmicutes	Bacilli	Lactobacillales	Lactobacillaceae	Lactobacillus	---
OTU_1039	45	26	1.07917	ZI-NegBin	0.00231297	0.0142516	Bacteroidetes	Bacteroidia	Bacteroidales	S24-7	---	---
OTU_220	44	26	1.01667	ZI-NegBin	0.0224715	0.084615	Firmicutes	Bacilli	Bacillales	Staphylococcaceae	Staphylococcus	sciuri
OTU_615	18	3	0.925	ZI-NegBin	0.00870987	0.0410527	Firmicutes	Bacilli	Lactobacillales	Lactobacillaceae	Lactobacillus	---
OTU_262	18	5	0.791667	ZI-NegBin	0.00558669	0.0291272	Firmicutes	Bacilli	Lactobacillales	Streptococcaceae	Lactococcus	---
OTU_14	6919	22706	-1081.3	NegBin	6.41489e-07	2.60872e-05	Bacteroidetes	Bacteroidia	Bacteroidales	S24-7	---	---
OTU_30	915	12295	-762.479	ZI-NegBin	4.78499e-08	4.16978e-06	Bacteroidetes	Bacteroidia	Bacteroidales	S24-7	---	---
OTU_13	12914	22141	-668.942	NegBin	0.00370561	0.0207378	Bacteroidetes	Bacteroidia	Bacteroidales	S24-7	---	---
OTU_22	4634	11379	-468.975	NegBin	0.00070908	0.00658787	Bacteroidetes	Bacteroidia	Bacteroidales	S24-7	---	---
OTU_45	2034	5619	-247.475	ZI-NegBin	0.00129618	0.00964231	Bacteroidetes	Bacteroidia	Bacteroidales	S24-7	---	---
OTU_24	3687	6987	-235.363	NegBin	0.0242998	0.0877092	Proteobacteria	Deltaproteobacteria	Desulfovibrionales	Desulfovibrionaceae	---	---
OTU_462	156	3157	-200.717	NegBin	0.000759244	0.00681086	Firmicutes	Clostridia	Clostridiales	---	---	---
OTU_115	123	2829	-180.912	NegBin	8.59262e-05	0.00134397	Bacteroidetes	Bacteroidia	Bacteroidales	S24-7	---	---
OTU_46	1407	3763	-162.929	ZI-NegBin	0.000273069	0.00333145	Bacteroidetes	Bacteroidia	Bacteroidales	S24-7	---	---
OTU_117	152	2332	-145.967	NegBin	5.83338e-07	2.54169e-05	Firmicutes	Clostridia	Clostridiales	---	---	---
OTU_71	370	2346	-133.275	ZI-NegBin	0.0251221	0.0896168	Bacteroidetes	Bacteroidia	Bacteroidales	[Odoribacteraceae]	Odoribacter	---
OTU_44	2367	4191	-131.463	NegBin	0.00431719	0.0239408	Bacteroidetes	Bacteroidia	Bacteroidales	S24-7	---	---
OTU_80	911	2380	-101.729	ZI-NegBin	6.0346e-05	0.00110586	Bacteroidetes	Bacteroidia	Bacteroidales	S24-7	---	---
OTU_123	70	1384	-87.8917	ZI-NegBin	2.15841e-07	1.18246e-05	Firmicutes	Clostridia	Clostridiales	---	---	---
OTU_73	1065	2313	-87.6375	NegBin	0.00016104	0.00218298	Bacteroidetes	Bacteroidia	Bacteroidales	S24-7	---	---
OTU_962	1298	2440	-81.5417	NegBin	0.000322539	0.00378363	Bacteroidetes	Bacteroidia	Bacteroidales	S24-7	---	---
OTU_372	164	983	-55.2833	NegBin	0.00208968	0.0134179	Firmicutes	Clostridia	Clostridiales	---	---	---
OTU_101	624	1393	-53.8667	ZI-NegBin	0.00141135	0.0101285	Firmicutes	Clostridia	Clostridiales	Ruminococcaceae	Oscillospira	---
OTU_133	273	1027	-51.4042	ZI-NegBin	0.000138171	0.0019601	Firmicutes	Clostridia	Clostridiales	---	---	---
OTU_160	310	1030	-49.2917	ZI-NegBin	0.000379668	0.00399306	Bacteroidetes	Bacteroidia	Bacteroidales	S24-7	---	---
OTU_1002	195	767	-38.9458	ZI-NegBin	0.0008848	0.00729362	Bacteroidetes	Bacteroidia	Bacteroidales	S24-7	---	---
OTU_705	208	778	-38.8667	NegBin	0.00168656	0.0114311	Firmicutes	Clostridia	Clostridiales	---	---	---
OTU_135	216	768	-37.7	NegBin	0.0187781	0.0739007	Bacteroidetes	Bacteroidia	Bacteroidales	S24-7	---	---
OTU_362	333	868	-37.0542	NegBin	0.00781312	0.0378254	Firmicutes	Clostridia	Clostridiales	Lachnospiraceae	---	---
OTU_195	143	642	-33.8625	NegBin	4.46457e-05	0.000972639	Bacteroidetes	Bacteroidia	Bacteroidales	S24-7	---	---
OTU_439	602	1033	-31.2417	ZI-NegBin	0.0125695	0.0528064	Bacteroidetes	Bacteroidia	Bacteroidales	Prevotellaceae	Prevotella	---
OTU_489	209	634	-29.2042	NegBin	0.00245283	0.0145383	Bacteroidetes	Bacteroidia	Bacteroidales	S24-7	---	---
OTU_687	121	492	-25.2375	NegBin	0.000879376	0.00729362	Bacteroidetes	Bacteroidia	Bacteroidales	S24-7	---	---
OTU_802	80	449	-24.9333	ZI-NegBin	1.60382e-05	0.000444697	Bacteroidetes	Bacteroidia	Bacteroidales	S24-7	---	---
OTU_119	149	509	-24.6208	ZI-NegBin	6.97659e-09	1.41857e-06	Bacteroidetes	Bacteroidia	Bacteroidales	S24-7	---	---
OTU_174	184	541	-24.5667	ZI-NegBin	0.0138421	0.0574398	Bacteroidetes	Bacteroidia	Bacteroidales	---	---	---
OTU_1040	229	568	-23.5542	NegBin	0.0028039	0.0162893	Bacteroidetes	Bacteroidia	Bacteroidales	S24-7	---	---
OTU_159	275	606	-23.2125	ZI-NegBin	0.0256021	0.0902732	Firmicutes	Clostridia	Clostridiales	Ruminococcaceae	---	---
OTU_203	156	470	-21.5833	NegBin	0.00194704	0.0129097	Firmicutes	Clostridia	Clostridiales	Lachnospiraceae	---	---
OTU_235	49	323	-18.4708	NegBin	9.10645e-05	0.00138873	Actinobacteria	Coriobacteriia	Coriobacteriales	Coriobacteriaceae	Adlercreutzia	---
OTU_521	27	302	-18.4458	NegBin	0.000352744	0.00391225	Firmicutes	Erysipelotrichi	Erysipelotrichales	Erysipelotrichaceae	Allobaculum	---
OTU_1015	53	321	-18.0875	NegBin	0.0103011	0.046893	Firmicutes	Clostridia	Clostridiales	---	---	---
OTU_228	95	350	-17.3958	NegBin	0.00352867	0.0199305	Firmicutes	Clostridia	Clostridiales	Ruminococcaceae	Ruminococcus	---
OTU_918	292	527	-16.8833	ZI-NegBin	0.0170456	0.0684067	Actinobacteria	Actinobacteria	Bifidobacteriales	Bifidobacteriaceae	Bifidobacterium	---
OTU_360	146	386	-16.6083	ZI-NegBin	0.0150947	0.0617969	Bacteroidetes	Bacteroidia	Bacteroidales	S24-7	---	---
OTU_740	221	452	-16.3208	NegBin	0.0100196	0.0459545	Proteobacteria	Deltaproteobacteria	Desulfovibrionales	Desulfovibrionaceae	---	---
OTU_134	214	429	-15.225	ZI-NegBin	0.0236212	0.086281	Bacteroidetes	Bacteroidia	Bacteroidales	[Odoribacteraceae]	Odoribacter	---
OTU_421	31	245	-14.3958	NegBin	4.30544e-08	4.16978e-06	Firmicutes	Clostridia	Clostridiales	---	---	---
OTU_270	94	300	-14.125	NegBin	0.0123786	0.052437	Firmicutes	Clostridia	Clostridiales	Ruminococcaceae	Ruminococcus	---
OTU_696	68	275	-14.0833	ZI-NegBin	0.00570323	0.0294144	Bacteroidetes	Bacteroidia	Bacteroidales	S24-7	---	---
OTU_222	53	260	-14.0208	ZI-NegBin	3.33525e-06	0.000113028	Firmicutes	Clostridia	Clostridiales	Ruminococcaceae	---	---
OTU_212	67	272	-13.9458	ZI-NegBin	0.000523086	0.00514649	Firmicutes	Erysipelotrichi	Erysipelotrichales	Erysipelotrichaceae	---	---
OTU_416	108	310	-13.9167	ZI-NegBin	6.16382e-05	0.00110586	Firmicutes	Clostridia	Clostridiales	Ruminococcaceae	Oscillospira	---
OTU_730	280	460	-13.1667	NegBin	0.026222	0.0919276	Proteobacteria	Betaproteobacteria	Burkholderiales	Alcaligenaceae	Sutterella	---
OTU_1025	225	407	-13.0708	NegBin	0.0289221	0.0973186	Bacteroidetes	Bacteroidia	Bacteroidales	S24-7	---	---
OTU_492	58	249	-12.975	NegBin	0.00585441	0.0297599	Firmicutes	Clostridia	Clostridiales	---	---	---
OTU_234	63	249	-12.6625	NegBin	0.00133037	0.00977744	Firmicutes	Clostridia	Clostridiales	Peptococcaceae	---	---
OTU_186	102	270	-11.625	ZI-NegBin	0.00518784	0.0275181	Bacteroidetes	Bacteroidia	Bacteroidales	Rikenellaceae	---	---
OTU_170	39	207	-11.3625	NegBin	0.000343936	0.0038852	Firmicutes	Clostridia	Clostridiales	Ruminococcaceae	Ruminococcus	---
OTU_1026	108	266	-10.9833	NegBin	0.000450284	0.00465548	Bacteroidetes	Bacteroidia	Bacteroidales	S24-7	---	---
OTU_255	30	180	-10.125	NegBin	0.00015302	0.00212141	Actinobacteria	Coriobacteriia	Coriobacteriales	Coriobacteriaceae	---	---
OTU_716	62	210	-10.125	NegBin	0.000622527	0.00600113	Bacteroidetes	Bacteroidia	Bacteroidales	S24-7	---	---
OTU_209	25	174	-10.0375	NegBin	0.00827591	0.0394399	Cyanobacteria	4C0d-2	YS2	---	---	---
OTU_1048	8	156	-9.9	NegBin	0.000124612	0.00185398	Firmicutes	Clostridia	Clostridiales	---	---	---
OTU_258	47	182	-9.19583	NegBin	0.0119844	0.0514821	Firmicutes	Clostridia	Clostridiales	---	---	---
OTU_336	82	214	-9.14167	NegBin	8.28708e-07	3.15945e-05	Bacteroidetes	Bacteroidia	Bacteroidales	S24-7	---	---
OTU_1139	19	148	-8.67917	NegBin	2.12388e-07	1.18246e-05	Bacteroidetes	Bacteroidia	Bacteroidales	Prevotellaceae	Prevotella	---
OTU_291	65	190	-8.60417	NegBin	0.00201389	0.0131299	TM7	TM7-3	CW040	F16	---	---
OTU_405	61	183	-8.3875	NegBin	0.00242578	0.0145383	Firmicutes	Clostridia	Clostridiales	---	---	---
OTU_600	11	134	-8.24583	NegBin	0.00809106	0.0388626	Firmicutes	Clostridia	Clostridiales	Ruminococcaceae	---	---
OTU_391	30	151	-8.19167	NegBin	0.0067567	0.0332386	Firmicutes	Clostridia	Clostridiales	---	---	---
OTU_353	19	138	-8.0125	NegBin	0.00013549	0.0019601	Firmicutes	Clostridia	Clostridiales	Lachnospiraceae	---	---
OTU_685	71	186	-7.9625	ZI-NegBin	0.00103543	0.00820279	Bacteroidetes	Bacteroidia	Bacteroidales	S24-7	---	---
OTU_313	3	119	-7.74583	NegBin	1.94011e-05	0.000514552	Firmicutes	Clostridia	Clostridiales	Ruminococcaceae	---	---
OTU_274	10	124	-7.64167	NegBin	4.43701e-05	0.000972639	Firmicutes	Clostridia	Clostridiales	---	---	---
OTU_283	24	133	-7.36667	NegBin	0.00260519	0.0152804	Firmicutes	Clostridia	Clostridiales	---	---	---
OTU_398	5	114	-7.2875	NegBin	0.00166697	0.0114253	Firmicutes	Clostridia	Clostridiales	Ruminococcaceae	---	---
OTU_747	23	128	-7.09583	NegBin	0.01576	0.0640905	Firmicutes	Erysipelotrichi	Erysipelotrichales	Erysipelotrichaceae	Allobaculum	---
OTU_574	19	117	-6.6125	NegBin	2.14779e-05	0.000545896	Firmicutes	Clostridia	Clostridiales	---	---	---
OTU_325	1	100	-6.60417	NegBin	8.57635e-05	0.00134397	Firmicutes	Clostridia	Clostridiales	---	---	---
OTU_253	34	126	-6.275	NegBin	0.00018859	0.00239667	Bacteroidetes	Bacteroidia	Bacteroidales	S24-7	---	---
OTU_826	60	148	-6.11667	NegBin	5.71955e-06	0.000183627	Bacteroidetes	Bacteroidia	Bacteroidales	S24-7	---	---
OTU_602	32	121	-6.06667	NegBin	0.000199356	0.00248178	Firmicutes	Clostridia	Clostridiales	Ruminococcaceae	Oscillospira	---
OTU_272	13	98	-5.72083	NegBin	6.90606e-05	0.00117019	Firmicutes	Erysipelotrichi	Erysipelotrichales	Erysipelotrichaceae	---	---
OTU_263	43	122	-5.44583	NegBin	0.00245483	0.0145383	Actinobacteria	Coriobacteriia	Coriobacteriales	Coriobacteriaceae	Adlercreutzia	---
OTU_364	44	118	-5.11667	NegBin	0.000866791	0.00729362	Proteobacteria	Deltaproteobacteria	Desulfovibrionales	Desulfovibrionaceae	---	---
OTU_260	9	78	-4.6375	NegBin	7.35159e-06	0.000224223	Firmicutes	Clostridia	Clostridiales	---	---	---
OTU_244	25	92	-4.57083	NegBin	0.000292859	0.00350282	Bacteroidetes	Bacteroidia	Bacteroidales	S24-7	---	---
OTU_288	10	75	-4.375	ZI-NegBin	6.76193e-05	0.00117019	Actinobacteria	Coriobacteriia	Coriobacteriales	Coriobacteriaceae	Adlercreutzia	---
OTU_320	10	75	-4.375	NegBin	0.000180893	0.00234776	Firmicutes	Clostridia	Clostridiales	---	---	---
OTU_406	37	98	-4.22083	NegBin	0.0298573	0.0995243	Firmicutes	Clostridia	Clostridiales	---	---	---
OTU_145	7	69	-4.1625	NegBin	0.0290251	0.0973186	Firmicutes	Clostridia	Clostridiales	Lachnospiraceae	Roseburia	---
OTU_326	11	72	-4.1125	NegBin	0.000713881	0.00658787	Actinobacteria	Coriobacteriia	Coriobacteriales	Coriobacteriaceae	Adlercreutzia	---
OTU_729	23	83	-4.09583	NegBin	0.00929745	0.0432935	Firmicutes	Clostridia	Clostridiales	---	---	---
OTU_515	13	71	-3.92083	NegBin	0.00148889	0.0104394	Firmicutes	Clostridia	Clostridiales	Lachnospiraceae	Dorea	---
OTU_828	17	63	-3.1375	NegBin	0.000629627	0.00600113	Bacteroidetes	Bacteroidia	Bacteroidales	S24-7	---	---
OTU_280	16	60	-3	NegBin	0.00118482	0.00903424	Firmicutes	Clostridia	Clostridiales	Lachnospiraceae	Coprococcus	---
OTU_311	8	52	-2.96667	NegBin	0.000777309	0.00687186	Firmicutes	Clostridia	Clostridiales	Lachnospiraceae	Coprococcus	---
OTU_345	2	43	-2.74167	NegBin	0.000515695	0.00514649	Firmicutes	Clostridia	Clostridiales	Ruminococcaceae	---	---
OTU_755	34	72	-2.675	NegBin	0.0270669	0.0941218	Bacteroidetes	Bacteroidia	Bacteroidales	S24-7	---	---
OTU_329	15	48	-2.2625	NegBin	0.00089876	0.00730992	Firmicutes	Clostridia	Clostridiales	Clostridiaceae	---	---
OTU_663	21	49	-1.95417	NegBin	0.0230405	0.0851799	Firmicutes	Clostridia	Clostridiales	Ruminococcaceae	Oscillospira	---
OTU_500	1	30	-1.9375	NegBin	0.00212777	0.0135202	Firmicutes	Clostridia	Clostridiales	---	---	---
OTU_302	4	31	-1.81667	NegBin	0.0126389	0.0528064	Firmicutes	Clostridia	Clostridiales	---	---	---
OTU_1041	13	38	-1.72083	NegBin	0.0203645	0.0790532	Bacteroidetes	Bacteroidia	Bacteroidales	S24-7	---	---
OTU_621	11	36	-1.7125	NegBin	0.00294363	0.0169398	Proteobacteria	Betaproteobacteria	Burkholderiales	Alcaligenaceae	Sutterella	---
OTU_349	10	34	-1.64167	NegBin	0.0062979	0.0314895	Firmicutes	Clostridia	Clostridiales	---	---	---
OTU_1051	6	28	-1.49167	NegBin	0.0143949	0.0593305	Firmicutes	Clostridia	Clostridiales	Lachnospiraceae	---	---
OTU_845	19	39	-1.4125	NegBin	0.0290361	0.0973186	Bacteroidetes	Bacteroidia	Bacteroidales	S24-7	---	---
OTU_1074	1	21	-1.3375	Poisson	0.00279203	0.0145383	Bacteroidetes	Bacteroidia	Bacteroidales	S24-7	---	---
OTU_1143	12	31	-1.31667	ZI-NegBin	0.00114516	0.00884237	Bacteroidetes	Bacteroidia	Bacteroidales	S24-7	---	---
OTU_646	8	27	-1.3	Poisson	0.00146187	0.010369	Bacteroidetes	Bacteroidia	Bacteroidales	S24-7	---	---
OTU_1104	7	22	-1.02917	Poisson	0.00531019	0.0279243	Bacteroidetes	Bacteroidia	Bacteroidales	S24-7	---	---
OTU_343	3	18	-1.0125	NegBin	0.0204761	0.0790532	Firmicutes	Clostridia	Clostridiales	Lachnospiraceae	---	---
OTU_365	2	15	-0.875	Poisson	0.00573822	0.0294144	Firmicutes	Clostridia	Clostridiales	---	---	---
OTU_928	65	68	-0.470833	ZI-NegBin	0.017408	0.0694044	Firmicutes	Clostridia	Clostridiales	---	---	---
	OTU Enriched in A20dDC vs. Cre-
	OTU Enriched in Cre- vs. A20dDC

## Sheet: Month 6
OTU ID	Total Reads (A20dDC)	Total Reads (Cre-)	Mean Read Difference (A20dDC minus Cre-)	Best Model	Best Model p value	Best Model q value	Phylum	Class	Order	Family	Genus	Species
OTU_11	33116	3979	1901.66	ZI-NegBin	0.00523052	0.0310565	Firmicutes	Bacilli	Lactobacillales	Lactobacillaceae	Lactobacillus	---
OTU_12	13353	437	856.585	NegBin	2.84399e-05	0.000609427	Bacteroidetes	Bacteroidia	Bacteroidales	Bacteroidaceae	Bacteroides	---
OTU_4	20403	6586	853.585	NegBin	0.00114145	0.0105365	Bacteroidetes	Bacteroidia	Bacteroidales	Bacteroidaceae	Bacteroides	acidifaciens
OTU_9	15824	4364	719.241	ZI-NegBin	0.000492376	0.00566318	Tenericutes	Mollicutes	Mycoplasmatales	Mycoplasmataceae	---	---
OTU_29	12194	2241	640.549	NegBin	0.000215337	0.00300775	Deferribacteres	Deferribacteres	Deferribacterales	Deferribacteraceae	Mucispirillum	schaedleri
OTU_18	8952	1941	447.492	NegBin	0.000381325	0.00466928	Bacteroidetes	Bacteroidia	Bacteroidales	Bacteroidaceae	Bacteroides	---
OTU_33	7340	955	415.872	ZI-NegBin	0.000215555	0.00300775	Bacteroidetes	Bacteroidia	Bacteroidales	Prevotellaceae	Prevotella	---
OTU_21	8642	2341	396.056	NegBin	0.0146091	0.059629	Proteobacteria	Alphaproteobacteria	Rickettsiales	---	---	---
OTU_42	7941	2447	341.169	NegBin	1.70489e-05	0.000426222	Bacteroidetes	Bacteroidia	Bacteroidales	S24-7	---	---
OTU_54	5695	1180	288.897	NegBin	0.00882912	0.0417124	Firmicutes	Clostridia	Clostridiales	Lachnospiraceae	---	---
OTU_43	4546	879	235.451	ZI-NegBin	0.00623575	0.0337067	Bacteroidetes	Bacteroidia	Bacteroidales	Bacteroidaceae	Bacteroides	---
OTU_39	3868	365	229.79	NegBin	1.16292e-06	6.97754e-05	Bacteroidetes	Bacteroidia	Bacteroidales	Porphyromonadaceae	Parabacteroides	distasonis
OTU_62	3454	27	228.19	NegBin	5.58509e-06	0.000239361	Bacteroidetes	Bacteroidia	Bacteroidales	Bacteroidaceae	Bacteroides	uniformis
OTU_57	4690	1173	222.436	ZI-NegBin	0.00259666	0.0185475	Firmicutes	Clostridia	Clostridiales	Lachnospiraceae	---	---
OTU_64	3573	845	173.2	ZI-NegBin	0.000500247	0.00566318	Firmicutes	Clostridia	Clostridiales	Ruminococcaceae	---	---
OTU_35	2649	109	168.215	NegBin	0.00491868	0.0298102	Firmicutes	Clostridia	Clostridiales	Lachnospiraceae	---	---
OTU_240	2938	619	148.251	NegBin	0.000582316	0.00647018	Firmicutes	Clostridia	Clostridiales	---	---	---
OTU_139	3057	858	137.8	ZI-NegBin	0.0157109	0.063693	Firmicutes	Clostridia	Clostridiales	---	---	---
OTU_49	3168	971	136.508	ZI-NegBin	4.5497e-05	0.00090994	Bacteroidetes	Bacteroidia	Bacteroidales	S24-7	---	---
OTU_79	2747	625	135.056	NegBin	0.0125039	0.0535883	Firmicutes	Clostridia	Clostridiales	Lachnospiraceae	[Ruminococcus]	gnavus
OTU_298	3877	1656	131.082	ZI-NegBin	0.0261881	0.0897878	Firmicutes	Clostridia	Clostridiales	Lachnospiraceae	[Ruminococcus]	gnavus
OTU_979	2371	517	118.297	NegBin	0.000775278	0.00750269	Proteobacteria	Alphaproteobacteria	Rickettsiales	---	---	---
OTU_92	2321	578	110.272	ZI-NegBin	0.00303067	0.0211442	Firmicutes	Clostridia	Clostridiales	---	---	---
OTU_110	2088	385	109.585	NegBin	0.00434936	0.0271835	Firmicutes	Clostridia	Clostridiales	---	---	---
OTU_104	1875	225	107.692	NegBin	7.01077e-05	0.00123719	Proteobacteria	Deltaproteobacteria	Desulfovibrionales	Desulfovibrionaceae	Desulfovibrio	---
OTU_25	2154	518	103.754	ZI-NegBin	0.0272211	0.0917566	Bacteroidetes	Bacteroidia	Bacteroidales	S24-7	---	---
OTU_876	1755	210	100.846	NegBin	1.69713e-05	0.000426222	Bacteroidetes	Bacteroidia	Bacteroidales	Porphyromonadaceae	Parabacteroides	distasonis
OTU_1095	1601	136	96.2718	NegBin	0.00519049	0.0310565	Bacteroidetes	Bacteroidia	Bacteroidales	Bacteroidaceae	Bacteroides	---
OTU_142	1682	213	95.7487	ZI-NegBin	0.000378431	0.00466928	Firmicutes	Clostridia	Clostridiales	---	---	---
OTU_66	1887	476	89.1846	ZI-NegBin	0.0118586	0.0519353	Bacteroidetes	Bacteroidia	Bacteroidales	S24-7	---	---
OTU_673	1299	124	77.0615	NegBin	0.00173831	0.0140944	Bacteroidetes	Bacteroidia	Bacteroidales	Bacteroidaceae	Bacteroides	---
OTU_55	3628	2172	74.7897	ZI-NegBin	0.0186445	0.0708021	Bacteroidetes	Bacteroidia	Bacteroidales	S24-7	---	---
OTU_91	1813	621	73.0974	ZI-NegBin	0.00690506	0.0358667	Firmicutes	Clostridia	Clostridiales	---	---	---
OTU_672	1257	142	72.8769	NegBin	6.54155e-05	0.00118937	Bacteroidetes	Bacteroidia	Bacteroidales	Bacteroidaceae	Bacteroides	acidifaciens
OTU_61	2300	1047	72.7949	ZI-NegBin	0.0198214	0.0734126	Bacteroidetes	Bacteroidia	Bacteroidales	S24-7	---	---
OTU_122	1144	75	70.4974	NegBin	0.00015771	0.00242631	Proteobacteria	Betaproteobacteria	Burkholderiales	Alcaligenaceae	Sutterella	---
OTU_106	996	104	58.4	NegBin	0.00153937	0.0128281	Bacteroidetes	Bacteroidia	Bacteroidales	Porphyromonadaceae	Parabacteroides	---
OTU_912	1072	189	56.9282	NegBin	0.000207231	0.00300775	Deferribacteres	Deferribacteres	Deferribacterales	Deferribacteraceae	Mucispirillum	schaedleri
OTU_67	1838	856	56.6872	ZI-NegBin	0.00811108	0.03932	Bacteroidetes	Bacteroidia	Bacteroidales	Rikenellaceae	AF12	---
OTU_76	999	139	55.9077	NegBin	6.50945e-07	4.88208e-05	Bacteroidetes	Bacteroidia	Bacteroidales	S24-7	---	---
OTU_840	803	8	52.9179	NegBin	5.0477e-07	4.3638e-05	Bacteroidetes	Bacteroidia	Bacteroidales	Bacteroidaceae	Bacteroides	ovatus
OTU_712	941	128	52.8872	NegBin	0.00377714	0.0249905	Firmicutes	Bacilli	Lactobacillales	Lactobacillaceae	Lactobacillus	reuteri
OTU_764	768	58	46.7385	NegBin	1.93976e-06	0.000105805	Proteobacteria	Deltaproteobacteria	Desulfovibrionales	Desulfovibrionaceae	Desulfovibrio	---
OTU_436	1094	386	43.241	NegBin	0.0221192	0.0799489	Firmicutes	Clostridia	Clostridiales	Lachnospiraceae	[Ruminococcus]	gnavus
OTU_707	937	256	42.7744	ZI-NegBin	0.000733269	0.00721746	Tenericutes	Mollicutes	Mycoplasmatales	Mycoplasmataceae	---	---
OTU_147	915	307	37.3846	ZI-NegBin	0.00122825	0.0108375	Firmicutes	Clostridia	Clostridiales	---	---	---
OTU_90	639	69	37.2923	ZI-NegBin	0.0185453	0.0708021	Bacteroidetes	Bacteroidia	Bacteroidales	S24-7	---	---
OTU_858	541	9	35.3744	NegBin	2.66951e-06	0.000125708	Bacteroidetes	Bacteroidia	Bacteroidales	Bacteroidaceae	Bacteroides	---
OTU_1140	525	18	33.6154	NegBin	1.19713e-05	0.000371479	Bacteroidetes	Bacteroidia	Bacteroidales	Bacteroidaceae	Bacteroides	---
OTU_204	556	54	32.9128	ZI-NegBin	1.48018e-12	8.88105e-10	Firmicutes	Clostridia	Clostridiales	Ruminococcaceae	Ruminococcus	---
OTU_677	715	236	29.5128	NegBin	0.000733775	0.00721746	Bacteroidetes	Bacteroidia	Bacteroidales	Bacteroidaceae	Bacteroides	acidifaciens
OTU_874	472	31	29.0821	NegBin	7.14551e-06	0.000285821	Bacteroidetes	Bacteroidia	Bacteroidales	Porphyromonadaceae	Parabacteroides	distasonis
OTU_100	762	287	28.7231	NegBin	0.0166659	0.0657863	Proteobacteria	Deltaproteobacteria	Desulfovibrionales	Desulfovibrionaceae	---	---
OTU_562	450	34	27.3846	NegBin	1.37897e-05	0.000393992	Bacteroidetes	Bacteroidia	Bacteroidales	Bacteroidaceae	Bacteroides	acidifaciens
OTU_832	507	188	19.3385	ZI-NegBin	0.00219919	0.0168784	Bacteroidetes	Bacteroidia	Bacteroidales	Bacteroidaceae	Bacteroides	---
OTU_897	403	100	19.1744	ZI-NegBin	0.00030527	0.004017	Tenericutes	Mollicutes	Mycoplasmatales	Mycoplasmataceae	---	---
OTU_124	645	334	17.3077	ZI-NegBin	0.02248	0.0807666	Actinobacteria	Coriobacteriia	Coriobacteriales	Coriobacteriaceae	Adlercreutzia	---
OTU_1110	328	60	17.2513	NegBin	0.00115993	0.0105448	Bacteroidetes	Bacteroidia	Bacteroidales	Prevotellaceae	Prevotella	---
OTU_1058	334	80	16.1128	NegBin	0.00151395	0.0127939	Firmicutes	Bacilli	Lactobacillales	Lactobacillaceae	Lactobacillus	reuteri
OTU_1180	245	20	14.7949	NegBin	0.0040651	0.0261439	Bacteroidetes	Bacteroidia	Bacteroidales	Bacteroidaceae	Bacteroides	---
OTU_198	290	66	14.2564	ZI-NegBin	2.26028e-05	0.000541428	Firmicutes	Clostridia	Clostridiales	Ruminococcaceae	Ruminococcus	---
OTU_389	329	104	13.9333	NegBin	0.00131483	0.01127	Bacteroidetes	Bacteroidia	Bacteroidales	Bacteroidaceae	Bacteroides	---
OTU_612	236	36	12.9641	NegBin	0.0057261	0.0321647	Bacteroidetes	Bacteroidia	Bacteroidales	Bacteroidaceae	Bacteroides	---
OTU_265	212	22	12.441	NegBin	0.0052796	0.0310565	Firmicutes	Clostridia	Clostridiales	Ruminococcaceae	---	---
OTU_131	186	1	12.3231	ZI-NegBin	7.99849e-06	0.000288379	Bacteroidetes	Bacteroidia	Bacteroidales	Rikenellaceae	---	---
OTU_674	268	75	12.0974	NegBin	5.53209e-05	0.00103727	Bacteroidetes	Bacteroidia	Bacteroidales	Bacteroidaceae	Bacteroides	acidifaciens
OTU_767	197	21	11.5179	NegBin	8.77396e-06	0.000292465	Bacteroidetes	Bacteroidia	Bacteroidales	Porphyromonadaceae	Parabacteroides	distasonis
OTU_323	257	81	10.9026	ZI-NegBin	0.0132531	0.0556074	Tenericutes	Mollicutes	Mycoplasmatales	Mycoplasmataceae	---	---
OTU_695	166	6	10.6051	NegBin	0.000393116	0.00471739	Bacteroidetes	Bacteroidia	Bacteroidales	Bacteroidaceae	Bacteroides	---
OTU_1156	169	9	10.5744	NegBin	0.0284595	0.0953951	---	---	---	---	---	---
OTU_1081	214	49	10.4974	NegBin	0.0138096	0.0575398	Deferribacteres	Deferribacteres	Deferribacterales	Deferribacteraceae	Mucispirillum	schaedleri
OTU_238	218	55	10.3026	NegBin	0.0179269	0.0689497	Actinobacteria	Coriobacteriia	Coriobacteriales	Coriobacteriaceae	Adlercreutzia	---
OTU_138	280	121	9.35897	ZI-NegBin	0.0141192	0.058024	Firmicutes	Clostridia	Clostridiales	Lachnospiraceae	[Ruminococcus]	gnavus
OTU_422	160	18	9.28205	NegBin	0.00030797	0.004017	Proteobacteria	Deltaproteobacteria	Desulfovibrionales	Desulfovibrionaceae	Desulfovibrio	---
OTU_511	188	46	8.99487	NegBin	0.0161802	0.0642922	Tenericutes	Mollicutes	Mycoplasmatales	Mycoplasmataceae	---	---
OTU_640	175	41	8.51282	NegBin	0.00016401	0.00246016	Firmicutes	Bacilli	Lactobacillales	Lactobacillaceae	Lactobacillus	---
OTU_386	221	84	8.27179	ZI-NegBin	0.00573604	0.0321647	Firmicutes	Clostridia	Clostridiales	Ruminococcaceae	Oscillospira	---
OTU_245	206	72	8.19487	ZI-NegBin	1.70285e-05	0.000426222	Firmicutes	Clostridia	Clostridiales	Lachnospiraceae	[Ruminococcus]	gnavus
OTU_185	118	9	7.17436	NegBin	0.00109673	0.0102818	Verrucomicrobia	Opitutae	HA64	---	---	---
OTU_568	146	44	6.34872	NegBin	0.0236172	0.0828674	Firmicutes	Clostridia	Clostridiales	Ruminococcaceae	---	---
OTU_300	118	21	6.25128	NegBin	0.0169419	0.0664387	Firmicutes	Clostridia	Clostridiales	Lachnospiraceae	---	---
OTU_201	94	1	6.18974	NegBin	0.000673748	0.00707936	Firmicutes	Clostridia	Clostridiales	Ruminococcaceae	Anaerotruncus	---
OTU_806	80	6	4.87179	NegBin	0.00762641	0.0381321	Bacteroidetes	Bacteroidia	Bacteroidales	Bacteroidaceae	Bacteroides	uniformis
OTU_1061	104	27	4.85641	NegBin	0.0112802	0.0505084	Firmicutes	Bacilli	Lactobacillales	Lactobacillaceae	Lactobacillus	---
OTU_570	83	20	3.99487	NegBin	0.00726443	0.0366274	Firmicutes	Clostridia	Clostridiales	Lachnospiraceae	[Ruminococcus]	gnavus
OTU_1166	79	18	3.88205	NegBin	0.00807152	0.03932	Firmicutes	Bacilli	Lactobacillales	Lactobacillaceae	Lactobacillus	---
OTU_967	70	12	3.74359	NegBin	0.00420109	0.0265332	Tenericutes	Mollicutes	Mycoplasmatales	Mycoplasmataceae	---	---
OTU_820	51	7	2.86154	NegBin	0.00128383	0.0111638	Firmicutes	Bacilli	Lactobacillales	Lactobacillaceae	Lactobacillus	---
OTU_700	46	3	2.8359	NegBin	0.0178971	0.0689497	Firmicutes	Clostridia	Clostridiales	[Mogibacteriaceae]	---	---
OTU_854	51	16	2.16923	NegBin	0.0159855	0.0642922	Actinobacteria	Coriobacteriia	Coriobacteriales	Coriobacteriaceae	Adlercreutzia	---
OTU_875	98	59	1.99487	ZI-NegBin	0.00690171	0.0358667	Firmicutes	Clostridia	Clostridiales	---	---	---
OTU_1039	42	14	1.72308	Poisson	0.00195998	0.0156798	Bacteroidetes	Bacteroidia	Bacteroidales	S24-7	---	---
OTU_528	28	2	1.71282	NegBin	0.00938395	0.0436463	Tenericutes	Mollicutes	Mycoplasmatales	Mycoplasmataceae	---	---
OTU_1153	24	12	0.676923	ZI-NegBin	0.000416243	0.00489698	Bacteroidetes	Bacteroidia	Bacteroidales	Rikenellaceae	---	---
OTU_30	1777	10992	-727.072	ZI-NegBin	0.0111047	0.0500966	Bacteroidetes	Bacteroidia	Bacteroidales	S24-7	---	---
OTU_899	332	2807	-193.79	NegBin	0.00553216	0.0316124	Firmicutes	Erysipelotrichi	Erysipelotrichales	Erysipelotrichaceae	Allobaculum	---
OTU_115	59	2344	-176.374	NegBin	3.12863e-05	0.000647303	Bacteroidetes	Bacteroidia	Bacteroidales	S24-7	---	---
OTU_556	726	2421	-137.831	ZI-NegBin	0.016161	0.0642922	Bacteroidetes	Bacteroidia	Bacteroidales	S24-7	---	---
OTU_498	293	1560	-100.467	NegBin	0.00548846	0.0316124	Firmicutes	Erysipelotrichi	Erysipelotrichales	Erysipelotrichaceae	Allobaculum	---
OTU_117	51	1316	-97.8308	NegBin	3.41632e-10	6.83264e-08	Firmicutes	Clostridia	Clostridiales	---	---	---
OTU_123	74	1230	-89.6821	NegBin	8.61862e-07	5.74574e-05	Firmicutes	Clostridia	Clostridiales	---	---	---
OTU_101	609	1223	-53.4769	ZI-NegBin	0.00257976	0.0185475	Firmicutes	Clostridia	Clostridiales	Ruminococcaceae	Oscillospira	---
OTU_705	218	745	-42.7744	NegBin	0.00693423	0.0358667	Firmicutes	Clostridia	Clostridiales	---	---	---
OTU_1002	118	658	-42.7487	ZI-NegBin	5.2577e-05	0.00101762	Bacteroidetes	Bacteroidia	Bacteroidales	S24-7	---	---
OTU_135	179	694	-41.4513	NegBin	0.0110127	0.0500576	Bacteroidetes	Bacteroidia	Bacteroidales	S24-7	---	---
OTU_372	151	660	-40.7026	NegBin	0.0026865	0.0189635	Firmicutes	Clostridia	Clostridiales	---	---	---
OTU_966	92	568	-37.559	NegBin	0.00711502	0.0364873	Firmicutes	Erysipelotrichi	Erysipelotrichales	Erysipelotrichaceae	Allobaculum	---
OTU_855	54	466	-32.2462	NegBin	0.0131558	0.0555879	---	---	---	---	---	---
OTU_416	95	460	-29.0513	ZI-NegBin	2.72367e-06	0.000125708	Firmicutes	Clostridia	Clostridiales	Ruminococcaceae	Oscillospira	---
OTU_203	190	542	-29.0256	NegBin	0.0139968	0.0579179	Firmicutes	Clostridia	Clostridiales	Lachnospiraceae	---	---
OTU_489	171	508	-27.6769	ZI-NegBin	0.0121399	0.0527823	Bacteroidetes	Bacteroidia	Bacteroidales	S24-7	---	---
OTU_522	112	441	-26.4564	NegBin	0.0194839	0.0734126	Firmicutes	Erysipelotrichi	Erysipelotrichales	Erysipelotrichaceae	Allobaculum	---
OTU_113	7	336	-25.3795	NegBin	2.60821e-10	6.83264e-08	Tenericutes	Mollicutes	Mycoplasmatales	Mycoplasmataceae	---	---
OTU_802	85	380	-23.5641	ZI-NegBin	0.00239814	0.017764	Bacteroidetes	Bacteroidia	Bacteroidales	S24-7	---	---
OTU_134	151	427	-22.7795	NegBin	0.00406603	0.0261439	Bacteroidetes	Bacteroidia	Bacteroidales	[Odoribacteraceae]	Odoribacter	---
OTU_687	140	393	-20.8974	NegBin	0.0233909	0.0828674	Bacteroidetes	Bacteroidia	Bacteroidales	S24-7	---	---
OTU_1167	36	266	-18.0615	NegBin	0.00667471	0.0355185	Firmicutes	Bacilli	Lactobacillales	Lactobacillaceae	Lactobacillus	---
OTU_119	211	406	-17.1641	NegBin	0.0208507	0.0761224	Bacteroidetes	Bacteroidia	Bacteroidales	S24-7	---	---
OTU_212	58	261	-16.2103	NegBin	0.000239863	0.00327086	Firmicutes	Erysipelotrichi	Erysipelotrichales	Erysipelotrichaceae	---	---
OTU_235	58	259	-16.0564	NegBin	0.0023588	0.017691	Actinobacteria	Coriobacteriia	Coriobacteriales	Coriobacteriaceae	Adlercreutzia	---
OTU_209	17	208	-14.8667	NegBin	0.000149746	0.00236442	Cyanobacteria	4C0d-2	YS2	---	---	---
OTU_224	69	252	-14.7846	NegBin	0.0203636	0.074958	Firmicutes	Clostridia	Clostridiales	Lachnospiraceae	Coprococcus	---
OTU_747	20	206	-14.5128	NegBin	0.000716312	0.00721746	Firmicutes	Erysipelotrichi	Erysipelotrichales	Erysipelotrichaceae	Allobaculum	---
OTU_696	45	224	-14.2308	NegBin	0.000141158	0.00228904	Bacteroidetes	Bacteroidia	Bacteroidales	S24-7	---	---
OTU_1015	28	203	-13.7487	NegBin	8.20197e-05	0.00136699	Firmicutes	Clostridia	Clostridiales	---	---	---
OTU_222	62	225	-13.1744	ZI-NegBin	2.43643e-05	0.000541428	Firmicutes	Clostridia	Clostridiales	Ruminococcaceae	---	---
OTU_194	83	237	-12.6974	NegBin	0.00812612	0.03932	Bacteroidetes	Bacteroidia	Bacteroidales	S24-7	---	---
OTU_404	33	183	-11.8769	NegBin	0.00668931	0.0355185	Firmicutes	Erysipelotrichi	Erysipelotrichales	Erysipelotrichaceae	Allobaculum	---
OTU_600	20	170	-11.7436	NegBin	0.00252193	0.0184532	Firmicutes	Clostridia	Clostridiales	Ruminococcaceae	---	---
OTU_377	91	230	-11.6256	NegBin	0.0271379	0.0917566	Firmicutes	Clostridia	Clostridiales	Lachnospiraceae	Dorea	---
OTU_231	30	175	-11.4615	NegBin	0.00879747	0.0417124	Firmicutes	Clostridia	Clostridiales	---	---	---
OTU_574	19	164	-11.3487	NegBin	8.17075e-06	0.000288379	Firmicutes	Clostridia	Clostridiales	---	---	---
OTU_1003	57	195	-11.2	NegBin	0.0261185	0.0897878	Firmicutes	Clostridia	Clostridiales	---	---	---
OTU_398	8	142	-10.3897	NegBin	8.03189e-05	0.00136699	Firmicutes	Clostridia	Clostridiales	Ruminococcaceae	---	---
OTU_902	49	177	-10.3487	NegBin	0.0105009	0.0480955	Bacteroidetes	Bacteroidia	Bacteroidales	S24-7	---	---
OTU_716	29	158	-10.2205	NegBin	3.38644e-08	5.07965e-06	Bacteroidetes	Bacteroidia	Bacteroidales	S24-7	---	---
OTU_274	5	135	-10.0513	NegBin	5.0911e-07	4.3638e-05	Firmicutes	Clostridia	Clostridiales	---	---	---
OTU_253	27	152	-9.89231	NegBin	7.33988e-08	8.80785e-06	Bacteroidetes	Bacteroidia	Bacteroidales	S24-7	---	---
OTU_247	23	146	-9.69744	NegBin	0.000661448	0.00707936	Firmicutes	Clostridia	Clostridiales	Clostridiaceae	---	---
OTU_617	14	137	-9.60513	NegBin	0.0124452	0.0535883	Firmicutes	Clostridia	Clostridiales	---	---	---
OTU_313	1	121	-9.24103	NegBin	1.23826e-05	0.000371479	Firmicutes	Clostridia	Clostridiales	Ruminococcaceae	---	---
OTU_602	53	162	-8.92821	NegBin	0.0247303	0.0862686	Firmicutes	Clostridia	Clostridiales	Ruminococcaceae	Oscillospira	---
OTU_207	20	131	-8.74359	NegBin	0.003513	0.0239523	Firmicutes	Clostridia	Clostridiales	---	---	---
OTU_405	50	153	-8.4359	NegBin	0.0058582	0.0324216	Firmicutes	Clostridia	Clostridiales	---	---	---
OTU_391	13	117	-8.13333	NegBin	0.000684338	0.00707936	Firmicutes	Clostridia	Clostridiales	---	---	---
OTU_729	23	125	-8.08205	NegBin	0.00220666	0.0168784	Firmicutes	Clostridia	Clostridiales	---	---	---
OTU_492	27	127	-7.96923	NegBin	0.00104511	0.00995339	Firmicutes	Clostridia	Clostridiales	---	---	---
OTU_206	38	136	-7.92821	NegBin	0.00167316	0.013752	Firmicutes	Clostridia	Clostridiales	---	---	---
OTU_266	18	106	-6.95385	NegBin	0.00198959	0.0157073	Proteobacteria	Alphaproteobacteria	Rickettsiales	mitochondria	---	---
OTU_258	32	110	-6.32821	NegBin	0.00804442	0.03932	Firmicutes	Clostridia	Clostridiales	---	---	---
OTU_260	15	94	-6.23077	NegBin	0.000331645	0.00423376	Firmicutes	Clostridia	Clostridiales	---	---	---
OTU_324	14	86	-5.68205	NegBin	0.00409588	0.0261439	Cyanobacteria	Chloroplast	Streptophyta	---	---	---
OTU_1139	31	100	-5.62564	NegBin	0.000614663	0.00670541	Bacteroidetes	Bacteroidia	Bacteroidales	Prevotellaceae	Prevotella	---
OTU_272	24	81	-4.63077	NegBin	0.0072361	0.0366274	Firmicutes	Erysipelotrichi	Erysipelotrichales	Erysipelotrichaceae	---	---
OTU_312	4	63	-4.57949	NegBin	2.42655e-05	0.000541428	Firmicutes	Clostridia	Clostridiales	Ruminococcaceae	---	---
OTU_276	28	82	-4.44103	NegBin	0.00588992	0.0324216	Firmicutes	Clostridia	Clostridiales	Ruminococcaceae	---	---
OTU_635	11	64	-4.18974	NegBin	0.00473819	0.0290093	Firmicutes	Clostridia	Clostridiales	---	---	---
OTU_544	27	76	-4.04615	NegBin	0.0197213	0.0734126	Bacteroidetes	Bacteroidia	Bacteroidales	S24-7	---	---
OTU_263	42	88	-3.96923	NegBin	0.0265716	0.0905849	Actinobacteria	Coriobacteriia	Coriobacteriales	Coriobacteriaceae	Adlercreutzia	---
OTU_288	12	61	-3.89231	NegBin	0.0117125	0.0516728	Actinobacteria	Coriobacteriia	Coriobacteriales	Coriobacteriaceae	Adlercreutzia	---
OTU_1032	8	55	-3.69744	NegBin	0.00819737	0.0393474	Firmicutes	Clostridia	Clostridiales	---	---	---
OTU_444	18	62	-3.56923	ZI-NegBin	0.00371948	0.0249905	Firmicutes	Clostridia	Clostridiales	---	---	---
OTU_315	21	63	-3.44615	ZI-NegBin	0.00379023	0.0249905	Firmicutes	Clostridia	Clostridiales	Lachnospiraceae	Coprococcus	---
OTU_1022	9	51	-3.32308	NegBin	0.00122236	0.0108375	Firmicutes	Clostridia	Clostridiales	---	---	---
OTU_280	30	68	-3.23077	NegBin	0.011487	0.0510533	Firmicutes	Clostridia	Clostridiales	Lachnospiraceae	Coprococcus	---
OTU_345	9	47	-3.01538	NegBin	0.0195845	0.0734126	Firmicutes	Clostridia	Clostridiales	Ruminococcaceae	---	---
OTU_589	17	53	-2.94359	NegBin	0.00549613	0.0316124	Firmicutes	Clostridia	Clostridiales	Lachnospiraceae	---	---
OTU_311	8	41	-2.62051	NegBin	0.00620152	0.0337067	Firmicutes	Clostridia	Clostridiales	Lachnospiraceae	Coprococcus	---
OTU_353	18	47	-2.41538	ZI-NegBin	0.0229512	0.0819687	Firmicutes	Clostridia	Clostridiales	Lachnospiraceae	---	---
OTU_320	10	37	-2.17949	NegBin	0.0173743	0.0676919	Firmicutes	Clostridia	Clostridiales	---	---	---
OTU_1055	10	34	-1.94872	NegBin	0.0249054	0.0863771	Bacteroidetes	Bacteroidia	Bacteroidales	S24-7	---	---
OTU_349	15	37	-1.84615	NegBin	0.0131419	0.0555879	Firmicutes	Clostridia	Clostridiales	---	---	---
OTU_307	20	39	-1.66667	ZI-NegBin	0.0103787	0.0479019	Firmicutes	Clostridia	Clostridiales	Ruminococcaceae	Oscillospira	---
OTU_329	7	26	-1.53333	NegBin	0.00899445	0.0421615	Firmicutes	Clostridia	Clostridiales	Clostridiaceae	---	---
OTU_1074	3	21	-1.41538	NegBin	0.00321726	0.022188	Bacteroidetes	Bacteroidia	Bacteroidales	S24-7	---	---
OTU_363	1	19	-1.39487	NegBin	0.0044848	0.027741	Firmicutes	Clostridia	Clostridiales	---	---	---
OTU_1104	5	20	-1.20513	Poisson	0.00222233	0.0168784	Bacteroidetes	Bacteroidia	Bacteroidales	S24-7	---	---
OTU_365	3	18	-1.18462	NegBin	0.0209336	0.0761224	Firmicutes	Clostridia	Clostridiales	---	---	---
OTU_1143	11	22	-0.958974	Poisson	0.0235347	0.0828674	Bacteroidetes	Bacteroidia	Bacteroidales	S24-7	---	---
	OTU Enriched in A20dDC vs. Cre-
	OTU Enriched in Cre- vs. A20dDC

## Sheet: Month 7
Supplemental Fig 3. Taxa significantly enriched in age matched A20dDC mice and control A20FL/FL (Cre-) mice. A20dDC versus A20FL/FL (Cre-) mice group’s comparison of mean relative abundance across repeated measures from 2 to 7 month old.
OTU ID	Total Reads (A20dDC)	Total Reads (Cre-)	Mean Read Difference (A20dDC minus Cre-)	Best Model	Best Model p value	Best Model q value	Phylum	Class	Order	Family	Genus	Species
OTU_9	25668	7599	1554.46	ZI-NegBin	0.000750093	0.0062947	Tenericutes	Mollicutes	Mycoplasmatales	Mycoplasmataceae	---	---
OTU_29	12961	2122	916.853	NegBin	9.22113e-06	0.000212086	Deferribacteres	Deferribacteres	Deferribacterales	Deferribacteraceae	Mucispirillum	schaedleri
OTU_18	9687	2530	612.635	NegBin	1.059e-06	3.65354e-05	Bacteroidetes	Bacteroidia	Bacteroidales	Bacteroidaceae	Bacteroides	---
OTU_12	7235	643	553.455	NegBin	6.14375e-07	2.98044e-05	Bacteroidetes	Bacteroidia	Bacteroidales	Bacteroidaceae	Bacteroides	---
OTU_111	6087	391	477.173	NegBin	0.00306866	0.0178097	Firmicutes	Clostridia	Clostridiales	---	---	---
OTU_57	5691	830	410.404	NegBin	0.00017014	0.00224802	Firmicutes	Clostridia	Clostridiales	Lachnospiraceae	---	---
OTU_41	5793	1527	365.288	NegBin	0.00268724	0.0158931	Firmicutes	Clostridia	Clostridiales	Lachnospiraceae	---	---
OTU_42	6586	2489	357.372	NegBin	0.000474688	0.00470013	Bacteroidetes	Bacteroidia	Bacteroidales	S24-7	---	---
OTU_43	4784	679	346.436	NegBin	0.000214139	0.00268941	Bacteroidetes	Bacteroidia	Bacteroidales	Bacteroidaceae	Bacteroides	---
OTU_35	3519	59	288.712	NegBin	7.50223e-06	0.000200471	Firmicutes	Clostridia	Clostridiales	Lachnospiraceae	---	---
OTU_60	4059	1019	259.865	NegBin	0.00443412	0.0241543	Bacteroidetes	Bacteroidia	Bacteroidales	S24-7	---	---
OTU_66	3363	431	247.096	ZI-NegBin	0.000357843	0.00383139	Bacteroidetes	Bacteroidia	Bacteroidales	S24-7	---	---
OTU_54	3449	913	217.186	NegBin	3.489e-05	0.000570177	Firmicutes	Clostridia	Clostridiales	Lachnospiraceae	---	---
OTU_64	2569	646	164.391	NegBin	0.000237768	0.00289517	Firmicutes	Clostridia	Clostridiales	Ruminococcaceae	---	---
OTU_83	3061	1260	158.16	NegBin	0.0166419	0.06419	Firmicutes	Clostridia	Clostridiales	---	---	---
OTU_33	2125	561	133.929	ZI-NegBin	0.0149206	0.0590173	Bacteroidetes	Bacteroidia	Bacteroidales	Prevotellaceae	Prevotella	---
OTU_1095	1663	109	130.199	NegBin	6.23924e-07	2.98044e-05	Bacteroidetes	Bacteroidia	Bacteroidales	Bacteroidaceae	Bacteroides	---
OTU_25	1938	481	124.5	ZI-NegBin	1.87931e-05	0.000372639	Bacteroidetes	Bacteroidia	Bacteroidales	S24-7	---	---
OTU_88	2077	823	109.776	NegBin	0.026946	0.0922969	Firmicutes	Clostridia	Clostridiales	Ruminococcaceae	Ruminococcus	---
OTU_104	1418	136	107.705	NegBin	4.31626e-11	1.3402e-08	Proteobacteria	Deltaproteobacteria	Desulfovibrionales	Desulfovibrionaceae	Desulfovibrio	---
OTU_673	1307	106	100.763	NegBin	9.92166e-07	3.62432e-05	Bacteroidetes	Bacteroidia	Bacteroidales	Bacteroidaceae	Bacteroides	---
OTU_707	1482	482	86.4231	NegBin	0.0222383	0.0798264	Tenericutes	Mollicutes	Mycoplasmatales	Mycoplasmataceae	---	---
OTU_39	1460	497	83.4359	NegBin	0.0006688	0.00584965	Bacteroidetes	Bacteroidia	Bacteroidales	Porphyromonadaceae	Parabacteroides	distasonis
OTU_90	977	15	80.2628	NegBin	0.00091655	0.00729715	Bacteroidetes	Bacteroidia	Bacteroidales	S24-7	---	---
OTU_912	1125	179	79.9808	NegBin	7.85154e-06	0.000200471	Deferribacteres	Deferribacteres	Deferribacterales	Deferribacteraceae	Mucispirillum	schaedleri
OTU_110	1071	190	74.6346	NegBin	1.02685e-07	7.08523e-06	Firmicutes	Clostridia	Clostridiales	---	---	---
OTU_105	1405	596	71.2372	NegBin	0.0299044	0.0982573	Firmicutes	Clostridia	Clostridiales	Ruminococcaceae	Oscillospira	---
OTU_240	1459	699	67.8141	ZI-NegBin	0.0173247	0.0664112	Firmicutes	Clostridia	Clostridiales	---	---	---
OTU_764	717	46	56.2115	NegBin	1.75779e-12	1.09159e-09	Proteobacteria	Deltaproteobacteria	Desulfovibrionales	Desulfovibrionaceae	Desulfovibrio	---
OTU_67	1267	688	52.6603	ZI-NegBin	0.00262937	0.0158528	Bacteroidetes	Bacteroidia	Bacteroidales	Rikenellaceae	AF12	---
OTU_662	705	83	52.3654	NegBin	0.00117617	0.00859297	Firmicutes	Clostridia	Clostridiales	Lachnospiraceae	---	---
OTU_59	1550	1014	51.1667	NegBin	0.0202748	0.0749442	Actinobacteria	Coriobacteriia	Coriobacteriales	Coriobacteriaceae	Adlercreutzia	---
OTU_76	747	178	48.5577	NegBin	0.000647412	0.00574347	Bacteroidetes	Bacteroidia	Bacteroidales	S24-7	---	---
OTU_897	673	188	41.6218	NegBin	0.00832036	0.0400538	Tenericutes	Mollicutes	Mycoplasmatales	Mycoplasmataceae	---	---
OTU_891	519	30	40.9423	ZI-NegBin	0.000452251	0.00460407	Firmicutes	Clostridia	Clostridiales	Peptostreptococcaceae	---	---
OTU_136	821	374	39.6474	NegBin	0.00223412	0.014014	Firmicutes	Clostridia	Clostridiales	---	---	---
OTU_876	708	252	39.6154	NegBin	0.00202334	0.0131627	Bacteroidetes	Bacteroidia	Bacteroidales	Porphyromonadaceae	Parabacteroides	distasonis
OTU_92	866	430	39.0897	ZI-NegBin	0.0135523	0.0557348	Firmicutes	Clostridia	Clostridiales	---	---	---
OTU_138	561	176	33.2115	NegBin	0.00123433	0.008913	Firmicutes	Clostridia	Clostridiales	Lachnospiraceae	[Ruminococcus]	gnavus
OTU_832	587	226	31.5321	NegBin	0.000275713	0.00323053	Bacteroidetes	Bacteroidia	Bacteroidales	Bacteroidaceae	Bacteroides	---
OTU_120	645	321	29.0577	ZI-NegBin	0.00574086	0.0289843	Bacteroidetes	Bacteroidia	Bacteroidales	S24-7	---	---
OTU_100	524	191	28.9744	NegBin	0.0010294	0.00772545	Proteobacteria	Deltaproteobacteria	Desulfovibrionales	Desulfovibrionaceae	---	---
OTU_466	355	24	27.7372	NegBin	0.0174542	0.0664972	Bacteroidetes	Bacteroidia	Bacteroidales	S24-7	---	---
OTU_323	438	139	25.8077	NegBin	0.0161941	0.0631581	Tenericutes	Mollicutes	Mycoplasmatales	Mycoplasmataceae	---	---
OTU_124	491	201	25.4551	ZI-NegBin	0.000191297	0.00247491	Actinobacteria	Coriobacteriia	Coriobacteriales	Coriobacteriaceae	Adlercreutzia	---
OTU_612	267	24	20.4038	NegBin	8.81442e-06	0.000210529	Bacteroidetes	Bacteroidia	Bacteroidales	Bacteroidaceae	Bacteroides	---
OTU_131	276	40	19.9231	NegBin	0.00991333	0.0450641	Bacteroidetes	Bacteroidia	Bacteroidales	Rikenellaceae	---	---
OTU_1156	239	10	19.1474	NegBin	0.00251945	0.01542	---	---	---	---	---	---
OTU_148	426	218	18.7308	NegBin	0.00548916	0.0281716	Actinobacteria	Coriobacteriia	Coriobacteriales	Coriobacteriaceae	Adlercreutzia	---
OTU_840	237	19	18.2885	NegBin	1.42609e-05	0.000305381	Bacteroidetes	Bacteroidia	Bacteroidales	Bacteroidaceae	Bacteroides	ovatus
OTU_1180	236	20	18.1282	NegBin	1.18791e-05	0.000263462	Bacteroidetes	Bacteroidia	Bacteroidales	Bacteroidaceae	Bacteroides	---
OTU_551	393	195	17.75	NegBin	0.00975291	0.0448634	Bacteroidetes	Bacteroidia	Bacteroidales	Prevotellaceae	Prevotella	---
OTU_858	243	36	17.4808	NegBin	0.00228805	0.0142088	Bacteroidetes	Bacteroidia	Bacteroidales	Bacteroidaceae	Bacteroides	---
OTU_380	331	139	16.891	NegBin	0.00172087	0.0116159	Firmicutes	Clostridia	Clostridiales	Ruminococcaceae	---	---
OTU_1081	246	47	16.8846	NegBin	0.00199899	0.0131627	Deferribacteres	Deferribacteres	Deferribacterales	Deferribacteraceae	Mucispirillum	schaedleri
OTU_1117	270	75	16.7308	NegBin	0.0162726	0.0631581	Tenericutes	Mollicutes	Mycoplasmatales	Mycoplasmataceae	---	---
OTU_562	237	44	16.3654	NegBin	7.27431e-06	0.000200471	Bacteroidetes	Bacteroidia	Bacteroidales	Bacteroidaceae	Bacteroides	acidifaciens
OTU_511	275	88	16.1474	NegBin	0.0110372	0.0482683	Tenericutes	Mollicutes	Mycoplasmatales	Mycoplasmataceae	---	---
OTU_1140	212	28	15.5128	NegBin	0.000152458	0.00210392	Bacteroidetes	Bacteroidia	Bacteroidales	Bacteroidaceae	Bacteroides	---
OTU_143	383	230	14.2244	ZI-NegBin	0.0114963	0.048946	Bacteroidetes	Bacteroidia	Bacteroidales	S24-7	---	---
OTU_265	187	33	13.0449	NegBin	0.00212456	0.0136016	Firmicutes	Clostridia	Clostridiales	Ruminococcaceae	---	---
OTU_356	274	131	12.7564	NegBin	0.0289342	0.0962181	Firmicutes	Clostridia	Clostridiales	Ruminococcaceae	Oscillospira	---
OTU_184	278	137	12.6282	NegBin	0.0194235	0.0726625	Firmicutes	Bacilli	Lactobacillales	Streptococcaceae	Streptococcus	---
OTU_188	237	93	12.5962	NegBin	0.00957576	0.0445281	Firmicutes	Clostridia	Clostridiales	Lachnospiraceae	---	---
OTU_496	271	137	12.0449	NegBin	0.0112452	0.0484949	Firmicutes	Clostridia	Clostridiales	Ruminococcaceae	Ruminococcus	---
OTU_204	255	123	11.7885	ZI-NegBin	0.0101594	0.0450641	Firmicutes	Clostridia	Clostridiales	Ruminococcaceae	Ruminococcus	---
OTU_874	175	43	11.2756	NegBin	8.07051e-06	0.000200471	Bacteroidetes	Bacteroidia	Bacteroidales	Porphyromonadaceae	Parabacteroides	distasonis
OTU_422	133	12	10.1603	NegBin	1.96014e-06	6.08624e-05	Proteobacteria	Deltaproteobacteria	Desulfovibrionales	Desulfovibrionaceae	Desulfovibrio	---
OTU_674	219	119	9.09615	NegBin	0.010113	0.0450641	Bacteroidetes	Bacteroidia	Bacteroidales	Bacteroidaceae	Bacteroides	acidifaciens
OTU_185	118	16	8.60256	NegBin	0.00267811	0.0158931	Verrucomicrobia	Opitutae	HA64	---	---	---
OTU_238	119	32	7.45513	NegBin	0.00171756	0.0116159	Actinobacteria	Coriobacteriia	Coriobacteriales	Coriobacteriaceae	Adlercreutzia	---
OTU_813	103	21	6.96795	NegBin	0.0116574	0.0492467	Firmicutes	Clostridia	Clostridiales	---	---	---
OTU_963	98	20	6.62821	NegBin	0.0301666	0.0985972	Firmicutes	Clostridia	Clostridiales	---	---	---
OTU_208	124	50	6.48718	NegBin	0.0139042	0.0561053	Bacteroidetes	Bacteroidia	Bacteroidales	S24-7	---	---
OTU_1110	96	31	5.61538	ZI-NegBin	0.010029	0.0450641	Bacteroidetes	Bacteroidia	Bacteroidales	Prevotellaceae	Prevotella	---
OTU_232	75	22	4.55769	NegBin	0.000893503	0.00720604	Bacteroidetes	Bacteroidia	Bacteroidales	Rikenellaceae	---	---
OTU_1031	55	6	4.12179	NegBin	0.000945274	0.00740207	Firmicutes	Clostridia	Clostridiales	Lachnospiraceae	---	---
OTU_62	53	10	3.64744	NegBin	0.0101316	0.0450641	Bacteroidetes	Bacteroidia	Bacteroidales	Bacteroidaceae	Bacteroides	uniformis
OTU_261	76	40	3.25641	NegBin	0.0215554	0.0778249	Actinobacteria	Coriobacteriia	Coriobacteriales	Coriobacteriaceae	---	---
OTU_247	138	111	2.96154	ZI-NegBin	0.000385858	0.00406132	Firmicutes	Clostridia	Clostridiales	Clostridiaceae	---	---
OTU_528	34	4	2.52564	NegBin	0.00316891	0.0180541	Tenericutes	Mollicutes	Mycoplasmatales	Mycoplasmataceae	---	---
OTU_806	36	7	2.46154	NegBin	0.00655918	0.0323274	Bacteroidetes	Bacteroidia	Bacteroidales	Bacteroidaceae	Bacteroides	uniformis
OTU_525	29	2	2.26282	NegBin	0.00363762	0.0201693	Bacteroidetes	Bacteroidia	Bacteroidales	Bacteroidaceae	Bacteroides	---
OTU_201	28	2	2.17949	ZI-NegBin	0.00160012	0.0110408	Firmicutes	Clostridia	Clostridiales	Ruminococcaceae	Anaerotruncus	---
OTU_411	176	165	1.97436	ZI-NegBin	0.0258194	0.0895744	Bacteroidetes	Bacteroidia	Bacteroidales	Rikenellaceae	---	---
OTU_300	45	26	1.75	ZI-NegBin	0.0160611	0.0631263	Firmicutes	Clostridia	Clostridiales	Lachnospiraceae	---	---
OTU_1039	32	13	1.66667	NegBin	0.0182219	0.0689989	Bacteroidetes	Bacteroidia	Bacteroidales	S24-7	---	---
OTU_1154	35	18	1.53205	ZI-NegBin	0.000611646	0.00558577	Actinobacteria	Coriobacteriia	Coriobacteriales	Coriobacteriaceae	Adlercreutzia	---
OTU_1017	16	1	1.25641	NegBin	0.0137596	0.0561053	Bacteroidetes	Bacteroidia	Bacteroidales	Bacteroidaceae	Bacteroides	---
OTU_1186	17	8	0.801282	ZI-NegBin	0.0190256	0.0716054	Firmicutes	Clostridia	Clostridiales	Lachnospiraceae	---	---
OTU_704	28	22	0.641026	ZI-NegBin	0.00148363	0.0104697	Bacteroidetes	Bacteroidia	Bacteroidales	S24-7	---	---
OTU_6	5974	35147	-2205.78	ZI-NegBin	0.00759754	0.0368599	Bacteroidetes	Bacteroidia	Bacteroidales	S24-7	---	---
OTU_8	5595	21954	-1222.52	NegBin	0.00184574	0.0123248	Firmicutes	Erysipelotrichi	Erysipelotrichales	Erysipelotrichaceae	Allobaculum	---
OTU_27	1841	12769	-828.814	ZI-NegBin	0.000776477	0.00642923	Firmicutes	Erysipelotrichi	Erysipelotrichales	Erysipelotrichaceae	Allobaculum	---
OTU_30	1266	9514	-626.346	ZI-NegBin	2.58577e-05	0.000446046	Bacteroidetes	Bacteroidia	Bacteroidales	S24-7	---	---
OTU_70	152	3855	-283.872	ZI-NegBin	6.85604e-07	3.04115e-05	Firmicutes	Clostridia	Clostridiales	---	---	---
OTU_115	58	2743	-206.167	NegBin	1.33101e-08	1.71478e-06	Bacteroidetes	Bacteroidia	Bacteroidales	S24-7	---	---
OTU_556	370	2079	-129.09	ZI-NegBin	0.0111182	0.0482824	Bacteroidetes	Bacteroidia	Bacteroidales	S24-7	---	---
OTU_117	87	1552	-112.135	NegBin	5.63255e-08	4.37227e-06	Firmicutes	Clostridia	Clostridiales	---	---	---
OTU_50	536	1904	-101.795	NegBin	4.77031e-05	0.000722527	Actinobacteria	Coriobacteriia	Coriobacteriales	Coriobacteriaceae	---	---
OTU_751	415	1744	-99.5705	NegBin	0.000523387	0.0049246	Firmicutes	Erysipelotrichi	Erysipelotrichales	Erysipelotrichaceae	Allobaculum	---
OTU_149	2	1151	-88.3718	NegBin	1.38066e-08	1.71478e-06	Firmicutes	Clostridia	Clostridiales	---	---	---
OTU_372	323	1379	-79.1603	NegBin	0.0294766	0.0973669	Firmicutes	Clostridia	Clostridiales	---	---	---
OTU_1066	331	1249	-68.4936	ZI-NegBin	0.000953567	0.00740207	Firmicutes	Erysipelotrichi	Erysipelotrichales	Erysipelotrichaceae	Allobaculum	---
OTU_521	76	822	-56.8974	NegBin	0.0015731	0.0109763	Firmicutes	Erysipelotrichi	Erysipelotrichales	Erysipelotrichaceae	Allobaculum	---
OTU_498	106	798	-52.5513	NegBin	4.64057e-05	0.000720449	Firmicutes	Erysipelotrichi	Erysipelotrichales	Erysipelotrichaceae	Allobaculum	---
OTU_1011	149	836	-51.891	NegBin	0.000626893	0.00564204	Firmicutes	Bacilli	Lactobacillales	Lactobacillaceae	Lactobacillus	---
OTU_462	191	867	-50.7756	NegBin	0.0206831	0.076001	Firmicutes	Clostridia	Clostridiales	---	---	---
OTU_133	188	848	-49.5641	NegBin	2.04022e-05	0.000372639	Firmicutes	Clostridia	Clostridiales	---	---	---
OTU_855	27	664	-48.8269	NegBin	0.000868719	0.00709835		---	---	---	---	---
OTU_1006	55	664	-46.4936	NegBin	3.12724e-07	1.76547e-05	Firmicutes	Erysipelotrichi	Erysipelotrichales	Erysipelotrichaceae	Allobaculum	---
OTU_341	131	721	-44.5449	NegBin	0.0289739	0.0962181	Firmicutes	Clostridia	Clostridiales	---	---	---
OTU_1023	56	610	-42.2564	NegBin	2.47204e-05	0.000438611	Firmicutes	Bacilli	Lactobacillales	Lactobacillaceae	Lactobacillus	---
OTU_123	142	609	-35.0128	NegBin	0.0115074	0.048946	Firmicutes	Clostridia	Clostridiales	---	---	---
OTU_129	81	492	-31.0962	NegBin	0.0120835	0.0507018	Proteobacteria	Deltaproteobacteria	Desulfovibrionales	Desulfovibrionaceae	Desulfovibrio	---
OTU_113	20	404	-29.4103	NegBin	3.43553e-05	0.000570177	Tenericutes	Mollicutes	Mycoplasmatales	Mycoplasmataceae	---	---
OTU_102	9	362	-27.0962	NegBin	1.95509e-08	2.02351e-06	Firmicutes	Clostridia	Clostridiales	Lachnospiraceae	---	---
OTU_802	66	421	-26.8846	ZI-NegBin	0.0048611	0.0261715	Bacteroidetes	Bacteroidia	Bacteroidales	S24-7	---	---
OTU_163	70	425	-26.859	NegBin	0.000282801	0.00325221	Firmicutes	Clostridia	Clostridiales	Ruminococcaceae	---	---
OTU_489	68	414	-26.1795	ZI-NegBin	0.000531355	0.00492495	Bacteroidetes	Bacteroidia	Bacteroidales	S24-7	---	---
OTU_150	231	542	-22.4423	NegBin	0.0237226	0.083703	Firmicutes	Clostridia	Clostridiales	Lachnospiraceae	---	---
OTU_574	16	304	-22.0513	NegBin	1.47704e-07	9.17244e-06	Firmicutes	Clostridia	Clostridiales	---	---	---
OTU_215	134	429	-21.8333	NegBin	0.000491962	0.00470013	Firmicutes	Clostridia	Clostridiales	---	---	---
OTU_159	217	497	-20.1474	NegBin	0.0022076	0.013989	Firmicutes	Clostridia	Clostridiales	Ruminococcaceae	---	---
OTU_1167	24	286	-20	NegBin	0.0010394	0.00772545	Firmicutes	Bacilli	Lactobacillales	Lactobacillaceae	Lactobacillus	---
OTU_416	110	378	-19.9103	NegBin	0.000354791	0.00383139	Firmicutes	Clostridia	Clostridiales	Ruminococcaceae	Oscillospira	---
OTU_522	43	286	-18.4167	NegBin	1.99587e-05	0.000372639	Firmicutes	Erysipelotrichi	Erysipelotrichales	Erysipelotrichaceae	Allobaculum	---
OTU_966	42	248	-15.5769	NegBin	0.00521233	0.0272005	Firmicutes	Erysipelotrichi	Erysipelotrichales	Erysipelotrichaceae	Allobaculum	---
OTU_332	101	310	-15.4295	NegBin	0.000328849	0.0036467	Firmicutes	Clostridia	Clostridiales	Lachnospiraceae	---	---
OTU_348	107	307	-14.6987	NegBin	0.00253276	0.01542	Firmicutes	Clostridia	Clostridiales	Lachnospiraceae	---	---
OTU_203	144	345	-14.5385	NegBin	0.00349662	0.0195622	Firmicutes	Clostridia	Clostridiales	Lachnospiraceae	---	---
OTU_509	104	292	-13.7949	NegBin	0.0281959	0.0951611	Firmicutes	Clostridia	Clostridiales	Lachnospiraceae	[Ruminococcus]	gnavus
OTU_545	87	268	-13.3654	NegBin	0.00488873	0.0261715	Actinobacteria	Actinobacteria	Bifidobacteriales	Bifidobacteriaceae	Bifidobacterium	---
OTU_716	33	209	-13.3269	NegBin	7.86755e-07	3.25717e-05	Bacteroidetes	Bacteroidia	Bacteroidales	S24-7	---	---
OTU_282	1	169	-12.9167	NegBin	1.95753e-05	0.000372639	Cyanobacteria	4C0d-2	YS2	---	---	---
OTU_1097	9	174	-12.6346	NegBin	9.40408e-11	1.94664e-08	Firmicutes	Clostridia	Clostridiales	---	---	---
OTU_421	50	217	-12.5256	NegBin	0.00607933	0.0304457	Firmicutes	Clostridia	Clostridiales	---	---	---
OTU_228	92	261	-12.4103	NegBin	0.0148187	0.05899	Firmicutes	Clostridia	Clostridiales	Ruminococcaceae	Ruminococcus	---
OTU_492	51	215	-12.2885	NegBin	0.00643433	0.0319658	Firmicutes	Clostridia	Clostridiales	---	---	---
OTU_1003	29	191	-12.2756	NegBin	0.0014835	0.0104697	Firmicutes	Clostridia	Clostridiales	---	---	---
OTU_1015	36	193	-11.8462	NegBin	0.00104499	0.00772545	Firmicutes	Clostridia	Clostridiales	---	---	---
OTU_1135	20	172	-11.5641	NegBin	0.000479898	0.00470013	Firmicutes	Erysipelotrichi	Erysipelotrichales	Erysipelotrichaceae	Allobaculum	---
OTU_391	13	161	-11.3013	NegBin	1.87732e-06	6.08624e-05	Firmicutes	Clostridia	Clostridiales	---	---	---
OTU_235	32	180	-11.1795	NegBin	0.000102699	0.00148316	Actinobacteria	Coriobacteriia	Coriobacteriales	Coriobacteriaceae	Adlercreutzia	---
OTU_398	6	146	-10.7308	NegBin	9.5436e-07	3.62432e-05	Firmicutes	Clostridia	Clostridiales	Ruminococcaceae	---	---
OTU_617	4	143	-10.6667	NegBin	2.9456e-08	2.61316e-06	Firmicutes	Clostridia	Clostridiales	---	---	---
OTU_209	15	149	-10.2115	NegBin	0.000413389	0.00427858	Cyanobacteria	4C0d-2	YS2	---	---	---
OTU_377	46	177	-9.78205	NegBin	0.00902674	0.0424667	Firmicutes	Clostridia	Clostridiales	Lachnospiraceae	Dorea	---
OTU_902	49	179	-9.6859	NegBin	0.0146489	0.0586901	Bacteroidetes	Bacteroidia	Bacteroidales	S24-7	---	---
OTU_635	29	156	-9.58333	NegBin	0.00897387	0.0424667	Firmicutes	Clostridia	Clostridiales	---	---	---
OTU_729	10	129	-9.08974	NegBin	3.13622e-06	9.27424e-05	Firmicutes	Clostridia	Clostridiales	---	---	---
OTU_274	11	125	-8.69872	NegBin	0.000111695	0.00157643	Firmicutes	Clostridia	Clostridiales	---	---	---
OTU_226	2	105	-7.91026	NegBin	0.00030463	0.00343955	Firmicutes	Clostridia	Clostridiales	Lachnospiraceae	---	---
OTU_591	57	158	-7.40385	NegBin	0.0223743	0.0798531	Actinobacteria	Coriobacteriia	Coriobacteriales	Coriobacteriaceae	Adlercreutzia	---
OTU_544	15	106	-6.90385	NegBin	8.64373e-05	0.00127804	Bacteroidetes	Bacteroidia	Bacteroidales	S24-7	---	---
OTU_301	4	86	-6.28205	NegBin	0.0131685	0.0545176	Firmicutes	Erysipelotrichi	Erysipelotrichales	Erysipelotrichaceae	---	---
OTU_1038	7	80	-5.57051	NegBin	0.000158398	0.00213837	Firmicutes	Erysipelotrichi	Erysipelotrichales	Erysipelotrichaceae	Allobaculum	---
OTU_260	14	85	-5.37179	NegBin	1.48606e-05	0.000307614	Firmicutes	Clostridia	Clostridiales	---	---	---
OTU_404	9	72	-4.78846	NegBin	0.000275557	0.00323053	Firmicutes	Erysipelotrichi	Erysipelotrichales	Erysipelotrichaceae	Allobaculum	---
OTU_230	34	94	-4.39744	NegBin	0.0139134	0.0561053	Firmicutes	Clostridia	Clostridiales	Ruminococcaceae	---	---
OTU_1022	3	57	-4.13462	NegBin	4.26425e-05	0.000678999	Firmicutes	Clostridia	Clostridiales	---	---	---
OTU_283	21	76	-4.09615	NegBin	0.00960831	0.0445281	Firmicutes	Clostridia	Clostridiales	---	---	---
OTU_1032	2	51	-3.75641	NegBin	0.000216539	0.00268941	Firmicutes	Clostridia	Clostridiales	---	---	---
OTU_353	11	60	-3.69872	NegBin	0.00504044	0.0267531	Firmicutes	Clostridia	Clostridiales	Lachnospiraceae	---	---
OTU_417	40	90	-3.58974	NegBin	0.00515599	0.0271345	Firmicutes	Clostridia	Clostridiales	Lachnospiraceae	Coprococcus	---
OTU_508	4	48	-3.35897	NegBin	0.00102306	0.00772545	Firmicutes	Erysipelotrichi	Erysipelotrichales	Erysipelotrichaceae	Allobaculum	---
OTU_1051	3	45	-3.21154	NegBin	0.000701283	0.00604856	Firmicutes	Clostridia	Clostridiales	Lachnospiraceae	---	---
OTU_725	7	48	-3.10897	NegBin	0.000490525	0.00470013	Bacteroidetes	Bacteroidia	Bacteroidales	S24-7	---	---
OTU_600	12	50	-2.84615	NegBin	0.0278599	0.0945411	Firmicutes	Clostridia	Clostridiales	Ruminococcaceae	---	---
OTU_320	13	51	-2.83974	NegBin	0.0199554	0.0742055	Firmicutes	Clostridia	Clostridiales	---	---	---
OTU_589	7	43	-2.72436	NegBin	0.000739943	0.00629459	Firmicutes	Clostridia	Clostridiales	Lachnospiraceae	---	---
OTU_345	4	38	-2.58974	NegBin	0.00328382	0.0185387	Firmicutes	Clostridia	Clostridiales	Ruminococcaceae	---	---
OTU_1010	8	42	-2.5641	NegBin	0.00555644	0.0282832	Firmicutes	Erysipelotrichi	Erysipelotrichales	Erysipelotrichaceae	Allobaculum	---
OTU_322	8	42	-2.5641	NegBin	0.0107292	0.0472542	Firmicutes	Clostridia	Clostridiales	Lachnospiraceae	---	---
OTU_651	34	70	-2.55128	NegBin	0.0265409	0.0915661	Actinobacteria	Actinobacteria	Bifidobacteriales	Bifidobacteriaceae	Bifidobacterium	---
OTU_166	1	32	-2.37821	NegBin	0.00312842	0.0179884	Firmicutes	Clostridia	Clostridiales	---	---	---
OTU_1055	6	34	-2.11538	NegBin	0.00203482	0.0131627	Bacteroidetes	Bacteroidia	Bacteroidales	S24-7	---	---
OTU_317	8	36	-2.10256	NegBin	0.00751768	0.0367597	Firmicutes	Clostridia	Clostridiales	Ruminococcaceae	---	---
OTU_1041	20	48	-2.02564	NegBin	0.02705	0.0922969	Bacteroidetes	Bacteroidia	Bacteroidales	S24-7	---	---
OTU_663	8	34	-1.94872	NegBin	0.00376665	0.0206999	Firmicutes	Clostridia	Clostridiales	Ruminococcaceae	Oscillospira	---
OTU_272	45	74	-1.94231	ZI-NegBin	0.024597	0.0862981	Firmicutes	Erysipelotrichi	Erysipelotrichales	Erysipelotrichaceae	---	---
OTU_828	10	34	-1.78205	NegBin	0.0226217	0.0802746	Bacteroidetes	Bacteroidia	Bacteroidales	S24-7	---	---
OTU_290	22	46	-1.70513	ZI-NegBin	0.0209937	0.0762404	Firmicutes	Clostridia	Clostridiales	Lachnospiraceae	[Ruminococcus]	gnavus
OTU_450	4	26	-1.66667	NegBin	0.00293102	0.0171713	Bacteroidetes	Bacteroidia	Bacteroidales	S24-7	---	---
OTU_363	8	30	-1.64103	NegBin	0.028781	0.0962181	Firmicutes	Clostridia	Clostridiales	---	---	---
OTU_359	1	21	-1.53205	NegBin	0.00536179	0.0277472	Actinobacteria	Coriobacteriia	Coriobacteriales	Coriobacteriaceae	Adlercreutzia	---
OTU_349	11	30	-1.39103	NegBin	0.0256643	0.0895367	Firmicutes	Clostridia	Clostridiales	---	---	---
OTU_458	4	22	-1.35897	NegBin	0.00880849	0.0420775	Actinobacteria	Coriobacteriia	Coriobacteriales	Coriobacteriaceae	Adlercreutzia	---
OTU_288	5	20	-1.12179	NegBin	0.0209891	0.0762404	Actinobacteria	Coriobacteriia	Coriobacteriales	Coriobacteriaceae	Adlercreutzia	---
OTU_365	5	19	-1.04487	Poisson	0.0125266	0.0522082	Firmicutes	Clostridia	Clostridiales	---	---	---
	OTU Enriched in A20dDC vs. Cre-
	OTU Enriched in Cre- vs. A20dDC
